# Supplementary material for: Association of HMGCR rs17671591 and rs3761740 with lipidemia and statin response in Uyghurs and Han Chinese
Source: PeerJ. 2024 Sep 27;12:e18144. doi: 10.7717/peerj.18144 (PMC11441381; doi:10.7717/peerj.18144)
Supplement: Supplemental Information 1 [file peerj-12-18144-s001.xlsx]

## Sheet: Sheet1
rs17671591	rs3761740	Gender	Ethnic Group	Age(Years old)	Fasting glucose(mmol/L) before oral statin	Fasting glucose(mmol/L) after oral statin	Triglycerides(TG)(mmol/L) before oral statin	Triglycerides(TG)(mmol/L) after oral statin	Total cholesterol(TC)(mmol/L) before oral statin	Total cholesterol(TC)(mmol/L) after oral statin	High-density lipoprotein cholesterol(HDL-C)(mmol/L) before oral statin	High-density lipoprotein cholesterol(HDL-C)(mmol/L) after oral statin	Low-density lipoprotein cholesterol(LDL-C)(mmol/L) before oral statin	Low-density lipoprotein cholesterol(LDL-C)(mmol/L) after oral statin	Apolipoprotein A1(APOA1)(mmol/L) before oral statin	Apolipoprotein A1(APOA1)(mmol/L) after oral statin	Apolipoprotein B(APOB)(mmol/L) before oral statin	Apolipoprotein B(APOB)(mmol/L) after oral statin	Lipoprotein a(Lpa)(mg/L) before oral statin	Lipoprotein a(Lpa)(mg/L) after oral statin	Non high-density lipoprotein cholesterol(Non-HDL-C)(mmol/L) before oral statin	Non high-density lipoprotein cholesterol(Non-HDL-C)(mmol/L) after oral statin	Alanine aminotransferase(ALT)(U/L) before oral statin
C/C	C/C	male	Han	74	4.94	5.12	1.6	1.24	4.16	3	1.58	1.87	1.62	1.64	1.66	1.62	0.59	0.49	146.76	129.42	2.58	1.13	20.07
T/T	C/C	female	Han	55	4.79	5.37	0.98	2.59	5.23	5.84	2.32	1.34	3.74	3.32	1.64		1.26		154.23		2.91	4.5	5.98
T/T	C/C	female	Han	61	4.38	10.47	1.87	1.58	4.64	4.18	1.64	1.96	2.53	2.13	1.65		0.82		844.6		3	2.22	12.1
C/T	C/C	female	Han	67	8.33	5.14	0.53	0.59	4.93	4.59	1.85	1.9	3.12	2.48	1.75	1.56	0.98	0.8	253.73	151.6	3.08	2.69	13.03
C/T	C/C	female	Han	69	7.27	8.53	1.21	0.96	4.34	2.95	1.24	0.99	2.54	1.79	1.81	1.26	0.79	0.42	246.96	308.61	3.1	1.96	13.38
C/C	C/C	male	Han	80	5.87	12.32	1.35	1.42	4.89	4.01	1.54	1.33	3.14	2.53	1.78	1.28	0.85	0.87	38	244.67	3.35	2.68	17.7
C/T	C/C	male	Han	62	14.02	3.52	1.43	0.65	4.97	2.93	1.25	1.57	3.17	1.29	1.68	1.3	0.86	0.54	170.47	236.29	3.72	1.36	15.59
C/C	C/C	female	Han	66	4.37	5.01	1.04	1.21	5.23	6.72	1.46	1.51	3.53	4.74	1.66	1.56	1.09	1.25	123.46	125.65	3.77	5.21	14.8
C/C	C/C	female	Han	55	10.4	5.58	1.11	0.66	5.89	3.39	1.78	2.13	3.65	1.31	1.68	1.73	0.95	0.53	185.75	86.1	4.11	1.26	12.32
C/C	C/C	female	Han	60	6.37	4.78	1.94	1.26	6.26	3.67	2.04	1.78	4.23	1.66	1.82	1.87	1.37	0.67	178.82	56.6	4.22	1.89	16.74
C/C	C/C	female	Han	68	4.51	3.88	1.88	1.05	5.54	3.54	1.31	1.07	4.14	2.31	4.3	1.1	1.17	0.78	62.65	72.1	4.23	2.47	16.18
C/T	C/C	female	Han	56	3.58	4.1	3.01	1.84	5.74	4.41	1.49	1.43	3.5	2.25	1.83	1.65	1.15	0.98	460.06	431.75	4.25	2.98	44.3
C/C	C/C	male	Han	49	12.95	8.53	2.66	1.79	6.06	3.62	1.69	1.08	3.93	2.48	1.62	1.1	1.17	0.8	220.81	26.13	4.37	2.54	30.55
C/C	C/C	male	Han	55	5.11	4.27	2.71	1.27	5.1	3.23	0.69	0.94	2.38	1.72	1.64	1.22	1.21	0.62	60.3	119	4.41	2.29	28.1
C/C	C/C	male	Han	55	13.94	8.54	2.32	1.9	5.51	4.25	0.86	0.84	3.6	2.74	1.62	0.99	0.95	0.97	72.3	186.2	4.65	3.41	15.8
C/T	C/A	male	Han	49	6.6	5.76	3.66	2.27	6.24	4.62	1.57	1.36	3.91	2.67	1.65	1.52	1.53	1.03	641	316.8	4.67	3.26	79.1
C/T	C/C	male	Han	56	4.5	4.84	1.18	0.64	5.81	3.18	1.09	1.03	3.71	1.61	1.64	1.43	1.57	0.86	476	295	4.72	2.15	10.8
C/T	C/C	male	Han	62	5.31	5.71	3.46	0.52	6.43	3.02	1.66	1.9	3.78	1.05	1.67	1.69	1.3	0.43	109.3	147.2	4.77	1.12	14
C/C	C/C	female	Han	58	5.57	4.93	2.84	1.84	6.16	4.04	1.35	0.91	3.11	2.28	1.66	1.15	1.3	0.98	1510.88	268.44	4.81	3.13	21.66
C/T	C/A	female	Han	49	6.93	6.37	1.81	2.94	6.53	6.31	1.56	0.97	5.03	4.58	2.16	1.3	1.13	1.49	41	26	4.97	5.34	17.8
C/T	C/C	female	Han	79	9.58	6.39	1.82	1.54	6.44	3.21	1.44	1.61	3.93	1.3	1.83	1.62	1.03	0.56	126.88	200.7	5	1.6	11.23
C/T	C/C	female	Han	60	4.79	5.25	1.41	1.12	6.97	5.01	1.66	1.54	4.97	2.62	1.64	1.56	1.49	0.88	255.9	297.32	5.31	3.47	35.7
C/C	C/C	female	Han	67	5.65	7.28	1.82	5.14	6.66	8.31	1.35	1.23	4.63	5.53	1.73	1.62	1.06	1.63	125.64	108.66	5.31	7.08	14.7
C/T	C/A	male	Han	45	6.17	4.35	1.63	1.75	7.19	3.82	1.3	1.35	4.58	2.72	1.67	1.31	1.29	0.91	194.74	293.95	5.89	2.47	57.93
C/T	C/C	female	Han	65	3.8	5.57	2.94	3.84	7.28	6.45	1.38	1.08	5.17	2.47	1.66	1.39	1.63	1.2	675.7	780	5.9	5.37	10.2
C/C	C/C	female	Han	57	6.78	6.43	3.57	1.73	7.62	4.8	1.49	1.78	5.3	3.28	1.88	1.72	1.21	0.92	90	134.53	6.13	3.02	50.6
C/T	C/C	female	Han	73	5.14	5.66	1.92	1.92	1.75	4.01	1.15	1.04	3.17	2.56	1.33	1.05	0.79	0.89	138.71	71.08	0.6	2.97	9.5
C/T	C/A	female	Han	62	10.52	5.34	1.47	2.12	2.46	4.1	1.01	1.12	1.51	2.88	1.01	1.05	0.44	0.79	140.51	260.32	1.45	2.98	30.04
C/T	C/C	male	Han	75	4.29	4.12	1.51	1.07	5.88	3.27	4.23	1.16	4.02	1.65	1.3	1.18	0.93	0.6	144.64	153.21	1.65	2.11	11.4
C/T	C/C	male	Han	79	4.56	5.2	0.9	0.46	2.97	3.04	1.08	1.42	1.72	1.51	1.15	1.4	0.54	0.57	44.67	11.1	1.89	1.62	16
C/C	C/C	male	Han	74	4.68	3.77	0.91	0.71	3.03	2.68	1.13	1.34	2.07	1.49	0.95	1.15	0.69	0.57	107.08	31.78	1.9	1.34	42.9
C/T	C/C	male	Han	56	9.23	9.62	1.09	1.93	2.78	4.82	0.69	0.84	1.52	3.58	0.87	0.96	0.56	0.96	428	374	2.09	3.98	17.8
C/T	C/C	female	Han	59	3.99	4.93	1.08	0.67	3.97	4.31	1.67	1.28	2.6	2.81	1.56	1.14	0.84	0.85	263.85	256.6	2.3	3.03	22.04
C/T	C/C	male	Han	61	5.2	5.91	0.5	0.57	4.16	2.71	1.75	1.87	2.44	1.56	1.43	1.39	0.75	0.47	118.6	165.73	2.41	0.84	12.4
C/T	C/C	male	Han	43	4.2	5.24	1.1	1.43	3.94	3.54	1.52	1.23	2.55	2.1	1.52	1.28	0.72	0.63	342.67	598.58	2.42	2.31	36.04
T/T	C/C	male	Han	46	5.93	5.79	2.81	1.93	3.34	3.83	0.85	0.94	2.32	2.74	0.95	1.05	0.68	0.71	365.22	572.1	2.49	2.89	99.88
C/T	C/C	female	Han	75	10.39	7.8	0.88	0.77	4.08	3.64	1.58	1.46	2.22	1.89	1.52	1.47	0.74	0.56	36.6	14	2.5	2.18	17.8
C/C	C/C	female	Han	57	3.5	11.56	1.84	3.73	3.92	5.66	1.41	1.06	3.11	2.88	1.24	1.22	0.84	0.81	369.33	482.8	2.51	4.6	21.77
C/T	C/C	female	Han	64	4.45	3.81	1.07	0.74	4.16	2.46	1.61	1.41	2.88	1.46	1.35	1.2	0.85	0.48	162.11	119.08	2.55	1.05	19.31
C/T	C/C	male	Han	59	5.75	5.7	1.66	1.68	3.84	3.71	1.28	1.36	2.56	2.13	1.13	1.16	0.84	0.7	143.32	133.1	2.56	2.35	19.41
C/C	C/C	male	Han	76	7.73	4.47	0.71	0.75	3.85	3.04	1.29	1.36	2.85	1.21	1.43	1.43	0.76	0.37	195.07	172.58	2.56	1.68	38.32
C/C	C/C	female	Han	39	4.96	5.09	0.87	0.93	4.3	2.72	1.73	1.57	2.71	1.48	1.28	1.42	0.93	0.49	57.43	132.56	2.57	1.15	7.6
C/C	C/C	female	Han	53	12.02	5.91	0.94	1.02	4.04	3.36	1.44	1.11	2.82	1.85	0.97	1.21	0.88	0.49	251	268.05	2.6	2.25	16.34
C/T	C/C	male	Han	62	6.15	8.11	1.71	1.52	3.27	2.98	0.67	0.7	2.1	1.83	0.8	1.11	0.84	0.62	844.9	469.68	2.6	2.28	71.8
T/T	C/A	male	Han	79	5.62	8.49	1.14	0.9	3.97	4.39	1.35	0.99	2.85	2.96	1.12	1.03	0.92	0.93	366.93	321.6	2.62	3.4	10.34
T/T	C/C	male	Han	79	9.97	10.66	1.09	0.98	3.35	3.04	0.68	0.6	2.67	2.2	1.06	0.79	0.71	0.84	104.92	38	2.67	2.44	12.34
C/C	C/C	male	Han	50	5.89	5.88	1.6	1.88	3.61	4.03	0.93	0.96	2.3	2.65	1.06	1.1	0.75	0.9	159.2	132.7	2.68	3.07	88.7
C/C	C/C	male	Han	54	4.17	4.08	1.59	0.87	4.22	2.58	1.49	1.22	2.75	1.28	1.45	1.33	0.82	0.42	184.9	63.3	2.73	1.36	17.04
C/T	C/C	female	Han	77	4.81	9.32	1.12	0.72	4.14	3.05	1.4	1.46	2.5	1.52	1.3	0.72	0.75	1.36	282.6	369.5	2.74	1.59	17.2
C/T	C/C	female	Han	64	3.95	4.89	1.31	1.25	4.38	3.93	1.59	2.13	3.26	1.65	1.37	1.83	0.86	0.68	191	239	2.79	1.8	4.1
C/T	C/C	female	Han	70	7.3	4.53	1.47	1.26	4.2	4.07	1.4	1.45	2.37	2.42	1.55	1.44	0.66	0.76	278.1	374.9	2.8	2.62	13.19
C/C	C/C	female	Han	79	5.2	5.16	1.69	1.26	4.14	4.02	1.33	1.04	2.84	2.77	1.42	1.3	0.94	0.87	66.49	540.54	2.81	2.98	17.1
C/T	C/C	male	Han	45	4.34	8.92	1.16	2.14	3.88	4.1	1.05	0.98	2.75	3.21	0.87	0.89	1	1.29	181.98	72.15	2.83	3.12	18.08
C/T	C/C	female	Han	64	11.77	7.17	2.16	2.01	3.66	3.27	0.83	0.95	2.48	1.43	1.03	0.99	0.63	0.5	84.92	89	2.83	2.32	9.1
C/T	C/C	male	Han	60	5.66	5.09	1.06	1.95	4.24	3.41	1.4	1.11	2.7	1.4	1.31	1.36	0.94	0.68	557.9	904.59	2.84	2.3	34.9
T/T	C/C	male	Han	61	7.87	4.53	1.2	1.25	4.18	2.97	1.32	0.73	2.85	2.06	1.15	0.95	0.94	0.57	67.31	25	2.86	2.24	25.08
C/T	C/C	male	Han	58	5.77	5.73	1.43	1.64	3.68	3.76	0.81	0.93	2.75	2.45	0.89	1.09	0.76	0.98	356	274.6	2.87	2.83	26.8
C/C	C/C	male	Han	53	4.97	4.49	1.67	1.3	3.94	2.49	1.07	0.91	2.77	1.23	0.88	0.55	1.07	1.12	41.2	64.6	2.87	1.58	13.9
C/T	C/C	male	Han	56	13.79	10.42	1.7	1.56	4.43	3.92	1.55	1.38	3.08	2.17	1.34	1.4	1.05	0.92	328.88	223.8	2.88	2.54	18.53
C/C	C/C	male	Han	62	5.81	6.05	2.44	5.7	3.84	3.86	0.95	0.67	2.78	1.87	1.09	1.04	0.91	0.84	190.93	345	2.89	3.19	20.3
C/T	C/C	male	Han	63	4.79	5	1.42	0.85	4.05	2.91	1.15	0.98	2.97	1.82	0.93	0.74	1.25	0.94	303.5	274.5	2.9	1.93	12.4
C/T	C/C	male	Han	60	7.22	6.04	1.82	1.64	3.84	3.59	0.91	1.01	2.48	2.22	1.15	1.26	0.96	0.86	195.7	95.1	2.93	2.58	21.3
C/C	C/C	female	Han	62	5.1	4.69	0.99	1.31	4.67	4.77	1.71	1.44	3.22	3.12	1.57	1.52	1.01	1.06	142.74	116.7	2.96	3.33	17.53
C/C	C/C	male	Han	56	4.68	8.07	1.93	2.3	3.86	4.01	0.9	0.89	2.57	2.72	1.04	1.31	0.83	0.77	84.7	492	2.96	3.12	14.2
C/T	C/C	male	Han	68	5.44	15.76	1.01	2.81	4.13	2.44	1.17	0.76	2.79	1.4	1.1	1.04	1.01	0.35	396	953.46	2.96	1.68	15.7
C/C	C/C	female	Han	63	4.62	4.98	0.89	0.93	4.47	3.85	1.47	1.78	2.78	2.54	1.45	1.39	0.76	0.77	44	51.69	3	2.07	10
C/C	C/C	male	Han	44	4.68	4.89	2.55	3.02	4.24	4.56	1.24	0.89	3.15	1.87	1.14	1.2	0.99	1	70.1	47.91	3	3.67	35.8
C/C	C/C	female	Han	72	4.8	4.64	1.15	0.93	4.88	4.15	1.87	1.7	2.9	2.02	1.51	1.57	0.71	0.66	152.92	43.8	3.01	2.45	7.6
T/T	C/C	female	Han	54	4.08	4.4	1.52	1.39	4.1	3.49	1.08	1	2.79	2.44	1.24	1.08	0.77	0.84	80.61	77.32	3.02	2.49	74.3
C/C	C/C	female	Han	69	7.16	9.24	1.37	1.43	4.49	4.54	1.47	1.14	2.81	2.64	1.39	1.55	0.89	0.76	46.56	149.45	3.02	3.4	29
C/C	C/C	female	Han	66	4.62	5.17	1.32	1.18	4.19	3.22	1.17	1.22	2.85	1.76	1.33	0.62	0.96	1.39	444.9	573.5	3.02	2	10.1
C/C	C/C	male	Han	53	4.64	4.53	1.93	1.3	4.24	3.48	1.2	0.95	2.51	2.14	1.23	1.17	0.84	0.71	410.15	368.85	3.04	2.53	119.2
C/C	C/C	male	Han	51	10.28	5.75	2.06	1.7	4.08	2.36	1.04	0.75	2.52	1.01	1.28	0.97	0.86	0.43	120.2	400.68	3.04	1.61	25.2
C/C	C/C	female	Han	72	4.85	4.26	1.59	1.31	3.86	2.75	0.81	0.81	2.85	1.49	0.97	0.93	0.89	0.54	185.8	206.3	3.05	1.94	17.5
T/T	C/C	female	Han	71	6.52	5.21	1.64	1.72	4.92	4.54	1.83	1.27	3.12	2.34	1.55	1.62	0.92	0.94	52	49	3.09	3.27	59
C/T	C/A	female	Han	61	5.23	4.85	2.32	1.05	4.02	2.99	0.92	1.01	2.57	1.83	1.23	1.03	0.85	0.54	73.29	90	3.1	1.98	19.7
C/C	C/C	male	Han	69	5.36	5.42	1.28	1.59	4.53	2.91	1.42	1.31	3.44	1.76	1.27	1.25	1.08	0.53	242.29	174.12	3.11	1.6	13.74
T/T	C/C	female	Han	62	4.81	8.34	1.93	1.37	4.31	4.3	1.19	0.95	2.92	2.49	1.46	1.74	0.82	1.04	96	271.63	3.12	3.35	19.1
C/T	C/C	female	Han	46	4.78	4.86	0.92	0.65	4.25	3.59	1.13	1.24	2.81	2.22	1.06	1.33	0.73	0.8	116.2	131.09	3.12	2.35	66
C/T	C/C	male	Han	44	4.98	4.72	2.69	1.05	4.22	2.61	1.09	1.04	3.03	1.49	1.09	1.05	1.03	0.56	153.81	68.9	3.13	1.57	28.59
C/C	C/C	male	Han	75	6.14	7.11	2.73	2.48	4.51	4.24	1.38	1.29	3.21	2.81	1.07	1.25	1.09	1.03	882.16	550.77	3.13	2.95	29.48
C/T	C/C	male	Han	61	4.83	5.02	1.96	1.82	4	3.39	0.86	0.82	2.8	1.8	1.03	0.82	1	0.61	145	299.68	3.14	2.57	39.4
C/C	C/C	male	Han	65	4.73	5.93	0.67	1.63	4.2	3.61	1.05	0.86	3.03	2.35	1.1	0.91	0.94	0.69	78.3	239.24	3.15	2.75	20
T/T	C/C	female	Han	73	3.88	3.76	1.02	0.82	4.45	3.11	1.3	1.36	3.07	1.85	1.39	1.31	1.06	0.79	716.9	710.9	3.15	1.75	11.9
C/C	C/C	female	Han	52	4.54	7.22	1.62	1.02	4.33	2.81	1.18	1.19	2.86	1.36	1.38	0.48	0.96	1.29	74.3	113.7	3.15	1.62	17.9
C/T	C/C	male	Han	62	4.65	4.58	1.52	1.12	3.98	2.77	0.82	1.01	2.82	1.61	0.92	1.13	0.92	0.55	91.3	71.3	3.16	1.76	17.9
C/T	C/C	female	Han	65	6.79	5.53	1.95	2.9	4.26	3.48	1.09	0.97	2.7	1.77	1.15	1.17	0.91	0.67	268.6	99.8	3.17	2.51	18.4
C/C	C/C	male	Han	74	5.24	4.42	1.27	1.48	4.4	3.51	1.21	1.27	2.33	1.89	1.29	1.44	0.85	0.72	225	408.61	3.19	2.24	15.6
C/C	C/C	male	Han	81	7.24	10.95	1.86	3.91	4.05	4.82	0.85	0.9	2.72	2.46	1	1.25	0.67	0.86	168	33	3.2	3.92	32.7
C/C	C/C	female	Han	62	4.16	4.38	1.17	1.08	4.39	3.21	1.19	1.34	2.99	2.11	1.3	1.16	0.92	0.72	33.8	140.51	3.2	1.87	56.3
C/C	C/C	male	Han	61	8.54	7.43	1.52	1.51	4	3.2	0.8	0.73	2.99	2.1	0.99	0.96	0.73	0.8	41	109	3.2	2.47	37
C/C	C/C	female	Han	67	6.83	5.72	2.23	1.08	3.97	2.75	0.77	0.98	2.68	1.41	0.81	1.21	0.77	0.51	73	96.66	3.2	1.77	18
C/C	C/C	male	Han	56	5.11	4.65	0.82	1.14	4.22	3.72	1.01	0.9	2.9	2.37	1.08	0.99	0.92	0.87	41.2	38.2	3.21	2.82	20
C/T	C/A	female	Han	37	5.82	6.93	1.08	1.02	4.35	3.97	1.14	1.39	3.08	2.3	1.26	1.39	0.71	0.57	359.43	313.82	3.21	2.58	5.08
C/C	C/C	male	Han	45	7.04	6.69	1.44	1.19	4.22	3.44	1.01	1.16	3.12	2.04	1.05	1.07	0.85	0.72	262.19	65.8	3.21	2.28	14.43
T/T	C/C	female	Han	74	5.61	7.94	1.69	1.79	4.05	3.75	0.82	0.99	2.87	2.26	1.12	1.2	0.86	0.82	172.66	81.3	3.23	2.76	12.7
C/C	C/C	male	Han	59	4.27	4.37	1.73	0.81	4.21	2.18	0.97	1.26	2.94	0.8	1.19	1.26	0.86	0.4	151.99	272.6	3.24	0.92	21.6
C/T	C/C	male	Han	48	6.87	4.78	1.74	1.18	4.19	2.28	0.95	1.2	2.79	1.39	1.21	1.22	0.87	0.43	113.66	111.59	3.24	1.08	12.06
C/C	C/C	male	Han	77	6.12	5.31	1.1	0.62	4.31	3.41	1.06	1.32	2.86	1.93	1.51	1.21	0.78	0.98	163.36	218.17	3.25	2.09	17.5
C/T	C/C	female	Han	70	4.48	4.62	1.47	1.31	4.46	3.51	1.21	1	3.35	2.44	1.26	1.26	1.09	0.68	96.14	102.37	3.25	2.51	15
C/T	C/C	male	Han	62	5.55	4.46	1.79	1.46	4.15	2.76	0.89	0.87	3	1.64	1.05	1.05	0.99	0.6	71	56.1	3.26	1.89	16.5
C/T	C/C	male	Han	61	9.88	12.76	4.43	9.05	4.34	4	1.06	0.71	2.75	1.1	1.3	0.58	0.83	0.89	229.87	41.4	3.28	3.29	14.58
T/T	C/A	female	Han	75	4.75	4.96	1.95	1.12	4.44	3.44	1.16	1.37	2.74	1.77	1.53	1.5	1	0.67	272.44	277.38	3.28	2.07	12.1
C/T	C/C	male	Han	43	4.51	4.2	1.37	0.96	4.49	3.53	1.2	1.03	3.24	2.25	1.15	1.14	1.01	0.8	416.88	625.3	3.29	2.5	17.52
C/T	C/C	female	Han	50	6.25	5.71	1.57	1.69	4.23	3.54	0.94	0.84	2.77	2.42	1.15	0.98	0.74	0.76	40.4	38.5	3.29	2.7	22.64
C/T	C/C	male	Han	66	5.31	16.27	1.56	1.44	3.98	3	0.68	0.82	3.01	1.53	0.91		1.03		97.8		3.3	2.18	5.3
C/T	C/C	female	Han	73	5.6	4.77	1.78	0.94	4.18	3.2	0.88	1.09	2.79	1.82	1.27	1.11	1.06	0.7	109.58	71.19	3.3	2.11	10.1
C/C	C/C	female	Han	73	4.91	4.35	1.44	0.92	4.28	4.38	0.98	1.33	2.98	2.92	1.1	1.38	1	1.03	263.2	369.5	3.3	3.05	29.6
C/T	C/C	male	Han	60	17.16	11.33	7.85	4.79	4.02	4.41	0.7	0.87	2.41	1.46	0.97	0.93	0.66	0.7	673.43	62.34	3.32	3.54	22.86
C/T	C/C	female	Han	61	4.56		1.59	1.43	4.47	2.98	1.15	0.97	2.89	1.92	1.4	1.14	1.04	0.56	199.2	201.9	3.32	2.01	20.3
C/T	C/A	male	Han	55	6.3	4.55	0.79	0.97	4.46	2.33	1.14	0.98	2.98	1.11	1.17	1.04	0.95	0.55	99.01	83.02	3.32	1.35	18.7
C/C	C/C	male	Han	52	5	4.04	1.32	0.84	4.94	3.72	1.61	1.35	2.83	1.91	1.57	1.09	0.97	0.59	260.9	313.7	3.33	2.37	25.5
C/T	C/C	male	Han	64	11.24	12.13	3.02	1.58	4.15	2.24	0.82	0.85	3.2	1.33	1.21	1.12	0.87	0.33	357.01	86.6	3.33	1.39	15.58
C/C	C/C	male	Han	67	4.26	4.32	1.83	0.79	4	2.77	0.66	0.76	2.63	1.82	0.94	0.82	0.89	0.71	126.72	320.3	3.34	2.01	18.1
T/T	C/C	male	Han	43	5.16	4.32	2.99	4.3	4.42	3.69	1.08	1.16	2.47	1.19	1.33	0.51	0.75	1.51	51.4	43.8	3.34	2.53	13
C/C	C/C	male	Han	54	5.72	5.79	3.09	1.93	4.19	3.09	0.85	0.79	2.92	1.83	1.01	1	0.88	0.59	249.02	161	3.34	2.3	15.16
C/C	C/C	male	Han	79	11.02	7.4	1.94	1.5	4.31	3.52	0.96	0.99	2.71	2.2	1.22	1.11	0.9	0.79	379.61	402.6	3.35	2.53	19.4
C/C	C/C	male	Han	56	4.56	5.92	1.71	0.84	4.22	2.85	0.87	0.9	2.74	1.4	1.03	1	1	0.68	277.76	65.17	3.35	1.95	23.3
C/T	C/A	male	Han	49	5.68	3.52	1.75	1	4.3	3.49	0.95	1.47	3.13	2.3	1.21	1.27	0.81	0.76	223.7	125.94	3.35	2.02	25.14
C/C	C/C	male	Han	48	5.04	5.53	2.35	2.42	4.2	3.79	0.85	0.88	1.92	2.19	1.38	1.11	1.49	0.71	203	74.1	3.35	2.91	25
T/T	C/C	female	Han	70	6.75	10.61	1.09	4	4.56	7.25	1.2	1.18	2.88	4.25	1.23		0.83		48.82		3.36	6.07	32.14
C/T	C/C	male	Han	58	4.64	4.59	2.9	0.64	4.43	3.43	1.06	1.37	3.25	2.25	1.45	1.34	0.78	0.73	784.65	453.04	3.37	2.06	21.37
T/T	C/C	male	Han	62	8.09	5.86	4.03	1.7	4.18	2.08	0.81	0.74	2.36	0.99	1.11	0.49	1.03	0.98	125.5	228.9	3.37	1.34	20.4
C/C	C/C	male	Han	59	7.21	6.11	2	1.78	4.57	3.43	1.2	1.29	3	2.21	1.32	1.18	0.98	0.8	61.2	184.63	3.37	2.14	24.8
C/C	C/C	male	Han	75	6.96	4.88	1.7	1.66	4.07	3.37	0.7	1.08	2.58	2.08	1.16	1.36	1.06	0.68	60	95.2	3.37	2.29	30.5
C/C	C/C	female	Han	58	6.96	9.91	2.39	2.62	4.23	3.59	0.86	0.33	3.14	2.45	0.63	0.76	0.99	0.88	179.01	39.72	3.37	3.26	10
C/T	C/C	male	Han	61	4.18	5.06	1.22	0.74	4.58	3.33	1.2	1.24	3.37	1.95	1.16	1.1	0.91	0.57	234.4	205.3	3.38	2.09	8.1
C/T	C/C	male	Han	53	5.32	3.64	1.75	1.79	4.73	3.63	1.35	1.47	3.15	2.16	1.4	0.74	1.03	1.75	237.7	294	3.38	2.16	16.3
C/T	C/C	female	Han	48	4.02	4.3	0.66	1.65	4.89	4.09	1.5	1.36	3.28	2.96	1.31	1.21	0.9	0.85	82.5	159.89	3.39	2.73	17.3
C/T	C/C	male	Han	61	6.85	4.87	0.94	0.76	5.03	3.18	1.64	1.53	3.69	1.59	1.34	0.63	1.14	0.63	101.15	125.5	3.39	1.65	14.48
C/C	C/C	female	Han	69	5.87	8.38	1.33	1.5	4.59	3.52	1.19	0.97	2.8	1.92	1.12	1.56	0.79	0.73	551.7	292.3	3.4	2.55	12.9
C/C	C/C	male	Han	57	4.57	7.51	2.13	3.92	4.25	3.34	0.85	0.87	2.66	1.73	1.09	1.21	0.91	0.68	248.89	304.45	3.4	2.47	38.8
C/C	C/C	female	Han	64	4.88	8.57	0.99	1.71	4.93	3.89	1.52	2.06	3.06	2.3	1.26	1.88	0.97	0.7	140.9	181.42	3.41	1.83	9
C/C	C/A	female	Han	52	4.68	4.79	1.56	1.03	4.54	4.39	1.13	1.07	3.02	3.01	1.29	1.35	0.7	0.92	98	111.41	3.41	3.32	18
C/C	C/C	male	Han	50	4.97	4.37	1.94	0.93	4.24	2.35	0.82	0.8	3.04	1.26	1.05	0.92	1.01	0.48	50	100.7	3.42	1.55	38.4
C/T	C/C	female	Han	56	4.43	5.85	1.74	2.25	4.71	3.91	1.28	0.95	3.16	1.94	1.42	1.17	1.06	0.87	102	25	3.43	2.96	16.8
C/T	C/C	female	Han	54	5.43	3.73	1.55	0.79	4.72	3.81	1.28	1.36	3.14	1.7	1.31	1.35	0.95	0.58	116.9	112.33	3.44	2.45	15.9
C/T	C/C	male	Han	81	6.5	4.11	1.23	2.17	4.42	4.29	0.96	1	3.12	2.73	1.15	1.19	1.02	1.01	246.94	263.8	3.46	3.29	50.21
C/T	C/C	female	Han	60	4.79	5.33	0.92	0.86	4.83	3.62	1.36	1.46	3.3	2	1.37	1.43	0.98	0.51	61.5	119.31	3.47	2.16	8.1
C/C	C/C	male	Han	60	4.49	5.13	1.7	1.89	5.06	4.52	1.58	1.17	3.57	2.75	1.48	1.28	1.15	0.67	149.6	59	3.48	3.35	23.4
C/T	C/A	male	Han	63	4.91	4.68	1.59	0.9	4.37	2.69	0.89	1.11	3.14	1.46	1.15	1.15	1.2	0.6	169.5	241.6	3.48	1.58	16.7
C/C	C/C	female	Han	67	4.8	5.56	1.82	1.79	4.42	3.26	0.94	0.92	2.82	1.88	1.26	1.14	0.88	0.65	81.54	186.7	3.48	2.34	8.8
C/C	C/C	female	Han	57	6.37	5.97	1	0.66	4.74	3.27	1.26	1.11	3.7	1.95	1.24	1.36	0.95	0.84	411	1059.9	3.48	2.16	11.7
C/T	C/C	male	Han	54	4.59	5.2	1.57	1.01	4.5	3.73	1.01	0.94	3.04	2.49	1.14	0.91	0.99	0.74	124	307.37	3.49	2.79	29
C/C	C/C	female	Han	61	6.23	8.14	1.08	1.48	5.33	3.72	1.84	1.6	3.87	2.41	1.42	1.44	1.14	0.81	308.14	543.51	3.49	2.12	11.98
C/T	C/C	male	Han	56	5.47	5.55	1.97	0.73	4.47	3.02	0.97	1.38	3.09	1.79	1.27	1.18	1.08	0.65	86.64	139.4	3.5	1.64	35.9
C/T	C/C	female	Han	57	5.29	4.34	2.36	1.31	4.82	2.89	1.32	0.92	3.5	1.65	1.35	0.64	1.15	1.02	186.91	166.6	3.5	1.97	24.29
C/T	C/C	male	Han	67	6.04	4.7	1.96	1.96	4.52	3.81	1.01	0.94	3.01	2.48	1.27	1.1	1.09	0.87	239.5	197.6	3.51	2.87	29
C/T	C/C	female	Han	62	6.41	5.82	2.63	1	5.05	2.51	1.54	1.21	3.6	1.22	1.37	1.14	0.99	0.47	223.96	41.1	3.51	1.3	2.74
C/T	C/C	male	Han	80	4.67	4.98	1.35	1.23	4.24	2.82	0.73	1	3.23	1.74	1.03	1.14	0.87	0.55	141.85	45.6	3.51	1.82	11.76
C/T	C/C	male	Han	55	4.77	4.92	3.6	1.75	4.1	2.87	0.58	0.73	2.8	1.74	0.95	0.76	1.07	0.97	118.2	197	3.52	2.14	60.1
T/T	C/C	male	Han	64	4.79	5	0.98	1.26	5.13	4.11	1.6	1.72	3.74	2.69	1.27	1.49	1.06	0.8	124.47	146.03	3.53	2.39	18.47
C/T	C/C	male	Han	52	4.76	5.93	0.96	0.97	5.12	3.5	1.58	1.3	3.77	2.11	1.33	1.42	1.06	0.86	314.89	405.4	3.54	2.2	13.3
T/T	C/A	male	Han	43	3.99	5.85	1.61	0.9	4.38	2.43	0.84	0.98	2.93	1.55	1.06	0.96	0.86	0.4	419.44	616.16	3.54	1.45	22.2
C/C	C/C	female	Han	68	6.9	4.62	2.74	1.59	4.66	2.33	1.12	0.87	3.44	1.38	1.1	1.02	1.23	0.5	173.73	39.9	3.54	1.46	33.69
C/T	C/C	male	Han	53	5.22	4.81	3.7	1.99	4.41	2.62	0.87	0.63	2.5	1.26	1.15	0.81	0.9	0.7	48.9	36	3.54	1.99	39.6
C/T	C/C	male	Han	54	5.2	5.93	2.96	2.56	4.44	3.92	0.9	0.92	2.43	2.36	1.17	1.06	0.88	0.95	788.79	959.7	3.54	3	32.21
C/C	C/C	male	Han	63	4.94	4.38	3.43	1.88	4.83	3.34	1.28	1.15	3.58	2.17	1.16	1.04	1.06	0.76	339.69	202.75	3.55	2.19	18.78
C/C	C/C	male	Han	51	4.5	5.26	1.11	0.61	4.6	4.15	1.04	0.93	3.26	3.05	0.97	0.93	1	1	593.4	1152.3	3.56	3.22	19.8
C/T	C/C	male	Han	68	5.31	4.39	1.34	1.23	4.69	3.74	1.13	0.98	3.39	2.7	1.26	1.13	1.06	0.81	54.9	136.07	3.56	2.76	23.9
C/C	C/C	female	Han	63	10.84	6.45	1.53	1.24	4.44	4.4	0.88	1.25	2.72	3.17	0.84	1.1	1.05	1.03	368.31	348.71	3.56	3.15	28.28
C/T	C/C	female	Han	39	3.93	4.45	1.42	1.34	4.56	2.6	0.98	1.01	2.99	1.76	1.18	1.08	0.92	0.56	62.66	143.69	3.58	1.59	65.8
C/C	C/C	male	Han	49	5.41	5.51	1.47	1.56	4.6	3.21	1.02	0.92	3.31	1.92	1.19	1.12	1.03	0.83	92.9	124.6	3.58	2.29	19.4
T/T	C/C	male	Han	67	3.34	5.02	1.01	0.97	4.9	2.7	1.32	1.2	3.65	1.8	0.92	0.84	1.09	0.75	866.51	1168.35	3.58	1.5	10.31
T/T	C/C	male	Han	57	19.9	12.13	2.85	2.46	4.39	2.89	0.79	0.86	2.51	1.96	1.12	1.33	0.92	0.61	173.29	280.53	3.6	2.03	24.99
C/T	C/C	male	Han	57	5.64	5.09	1.79	1.52	4.66	4.29	1.05	0.9	3.24	3.03	0.92	1.01	1.07	1.06	132.47	22.6	3.61	3.39	30.39
C/T	C/A	male	Han	66	4.63	4.75	1.2	1.01	5.19	3.15	1.58	1.43	3.71	1.71	1.36	1.32	1.09	0.47	183.4	124.8	3.61	1.72	16.36
C/T	C/C	male	Han	55	4.53	5.13	2.33		4.62		1.01		3.2		1.11		0.97		146.2		3.61	0	20.4
C/C	C/C	female	Han	73	7.05	4.21	4.09	3.68	4.77	4.19	1.15	1.12	2.15	1.88	1.19	1.25	0.82	0.86	22	1.7	3.62	3.07	26.84
C/C	C/C	male	Han	78	5.64	5.11	0.95	0.69	4.46	2.39	0.84	0.86	3.36	1.5	0.84	1.01	1.15	0.45	949	550.94	3.62	1.53	22.9
C/T	C/C	male	Han	56	4.78	4.45	1.65	1.56	4.69	3.44	1.07	0.85	3.45	2.33	1.06	0.86	1.08	0.72	270.7	97	3.62	2.59	22.9
C/C	C/C	male	Han	55	5.64	5.05	1.93	1.61	4.59	3.08	0.95	0.96	3.28	1.86	1.03	0.83	1.19	0.98	229.7	157.8	3.64	2.12	28.5
C/T	C/C	male	Han	64	5.14	5.69	1.09	0.97	5.44	2.65	1.8	1.34	4.04	1.62	1.5	1.24	1.22	0.54	178.91	168.72	3.64	1.31	15.43
C/T	C/C	female	Han	71	6.07	8.18	0.62	1.39	4.34	5.05	0.69	1.07	3.82	3.5	0.64	1.16	0.94	0.96	224.48	184.85	3.65	3.98	29.89
C/C	C/C	male	Han	46	6.46	4.73	4.27	1.85	4.58	2.48	0.93	1.14	2.89	1.5	0.99	0.97	0.86	0.5	311.54	35.07	3.65	1.34	23.43
C/C	C/C	male	Han	44	4.8	4.6	1.61	1.34	4.94	2.29	1.29	1.3	3.21	1.36	1.44	1.12	0.93	0.41	168.12	55.46	3.65	0.99	17.5
C/C	C/C	male	Han	69	6.05	4.37	2.35	1.24	4.27	3.13	0.61	0.75	3.16	2.06	0.78	0.83	0.65	0.69	391.14	220.4	3.66	2.38	27.84
C/C	C/C	female	Han	65	4.57	4.23	1.7	0.99	4.6	2.95	0.93	0.88	3.22	1.93	1.18	1.16	1.02	0.58	86.09	48	3.67	2.07	27.1
C/C	C/C	female	Han	68	4.51	4.95	0.88	0.97	5.13	3.18	1.45	1.65	3.55	1.44	1.51	1.46	0.97	0.54	153.21	147.26	3.68	1.53	11.3
T/T	C/C	male	Han	42	9.48	4.34	0.52	1.44	4.43	2.5	0.74	1.2	2.83	1.55	1.4	1.15	1.15	0.49	286.38	234.8	3.69	1.3	22.9
C/T	C/C	male	Han	73	10.24	8.46	1.02	0.82	4.68	3.21	0.99	0.77	3.4	1.98	1.15	1.14	1	0.71	343.36	385.77	3.69	2.44	87.87
C/C	C/C	female	Han	78	6.21	6.92	1.3	1.77	5.39	3.74	1.7	1.3	3.7	1.89	1.36	1.38	0.88	0.61	186.36	266.6	3.69	2.44	12.37
C/T	C/C	male	Han	71	5.83	5.09	0.74	1.67	4.84	3.76	1.15	1.17	3.23	2.22	1.39	1.41	1.06	0.82	507.95	1263.4	3.69	2.59	14.52
C/C	C/C	female	Han	61	4.56	5.4	2.22	2.45	5.11	3.43	1.42	1.25	3.65	2.34	1.07	1.87	1.06	0.69	396.29	274.29	3.69	2.18	17.22
C/C	C/C	female	Han	65	5.15	5.63	2.68	2.3	4.41	3.15	0.72	0.57	2.82	1.47	0.86	0.95	0.92	0.71	179.1	238.6	3.69	2.58	15.2
C/C	C/C	male	Han	73	4.97	3.91	1.45	1.48	4.45	6.16	0.75	1.7	3.1	3.94	1.34	1.46	1.11	1.16	427	954.6	3.7	4.46	44.5
C/C	C/C	female	Han	67	5.2	5.31	2.61	2.2	4.79	3.81	1.09	1.03	3.03	1.45	1.26	1.47	0.92	0.75	60.04	33.73	3.7	2.78	28.3
C/C	C/C	female	Han	72	4.78	8.85	1.83	2.26	4.88	2.44	1.17	0.9	3	1.38	1.27	1.11	0.9	0.54	195	174.11	3.71	1.54	16.6
C/T	C/C	female	Han	79	4.35	4.16	0.9	0.67	4.99	3.66	1.27	1.94	3.6	2.02	1.19	1.38	1.16	0.74	223.9	281.94	3.72	1.72	9.1
C/C	C/C	male	Han	63	8.52	4.51	3.14	3.04	4.7	4.09	0.98	0.81	3.11	2.12	1.22	1.11	0.86	0.77	293.57	129.6	3.72	3.28	22.22
C/T	C/A	male	Han	47	8.91	6.77	1.68	1.64	4.97	4.23	1.24	0.99	3.75	2.67	1.19	1.38	1.21	0.84	388.25	342.4	3.73	3.24	28.73
C/C	C/C	male	Han	43	8.27	6.88	2.77	2.46	4.5	4.12	0.77	0.83	3.2	2.89	0.93	1.05	0.95	0.89	159.26	200.28	3.73	3.29	35.53
C/T	C/C	female	Han	74	3.92	5.09	3.89	3.08	4.59	2.46	0.86	0.84	2.58	1.55	1.17	0.92	0.83	0.58	46	215.92	3.73	1.62	10.1
C/C	C/C	male	Han	73	4.59	4.49	1.2	1.06	4.84	4.62	1.1	1.34	3.4	2.93	1.17	1.41	1.05	0.97	159.51	404.21	3.74	3.28	16.9
C/T	C/C	male	Han	68	7.23	4.76	1.29	1.01	4.86	2.49	1.12	0.96	4.02	1.37	1.37	1.1	1.13	0.42	138	130	3.74	1.53	32.01
C/T	C/C	female	Han	60	15.01	7.18	0.73	1.64	4.46	4.14	0.7	1.03	3.33	2.95	1.35	1.15	1.07	0.74	11.3	20	3.76	3.11	82
C/T	C/C	female	Han	67	9.7	5.58	1.34	1.1	4.85	5.35	1.09	0.81	3.33	3.47	1.42	1.23	1.03	1	110.43	378.48	3.76	4.54	18.9
C/C	C/C	male	Han	52	4.74	5.08	1.72	1.24	4.72	3.94	0.96	1.04	3.26	2.6	1.03	1.01	1.19	1.02	243.7	230.7	3.76	2.9	25.5
C/C	C/C	male	Han	49	4.81	5.59	1.83	1.23	4.9	3.28	1.14	1.05	3.53	2.36	1.15	1.09	0.94	0.77	140.42	109.55	3.76	2.23	52.63
C/C	C/C	male	Han	77	4.66	5.23	1.46	1.85	4.64	3.02	0.87	0.92	3.55	2.11	0.87	0.86	0.99	0.77	92.95	182.44	3.77	2.1	19.9
C/C	C/C	male	Han	69	6.88	7.04	1.12	1.11	4.99	3.99	1.22	1.14	3.33	2.52	1.35	1.38	1.08	0.7	517.08	485.39	3.77	2.85	34.3
C/C	C/C	female	Han	55	5.15	4.86	1.36	2.45	5.22	5.37	1.44	1	3.83	3.75	1.23	1.11	1.24	1.21	144.06	102.1	3.78	4.37	23.1
C/T	C/C	male	Han	30	6.08	6.91	5.2	3.8	4.82	4.01	1.04	0.87	3.25	2.32	1.02	1.13	1	0.85	570.93	69.5	3.78	3.14	32.95
C/C	C/C	male	Han	60	5.29	4.34	1	0.59	4.6	3.24	0.8	0.71	3.48	2.42	0.94	0.82	0.96	0.65	372.61	217	3.8	2.53	24.85
C/T	C/C	female	Han	77	5.1	5.3	1.43	1.69	4.79	3.74	0.99	1.18	3.53	2.22	1.08	1.26	1.13	0.8	107.1	214.3	3.8	2.56	8.9
T/T	C/C	female	Han	67	6.71	4.64	2.06	0.55	4.91	3.57	1.11	1.36	3.22	1.79	1.56	1.57	0.83	0.53	115	186.8	3.8	2.21	16.2
C/T	C/C	male	Han	58	6.53	13.4	3.12	2.95	5.06	3.34	1.26	1.07	3.46	2.24	1.34	1.16	1.2	0.82	181.72	178.2	3.8	2.27	40.74
C/C	C/C	male	Han	48	6.93	5.48	0.98	4.29	4.86	2.87	1.04	1.05	3.23	1.53	1.42	1.09	0.73	0.56	110.19	189.4	3.82	1.82	20.76
C/C	C/C	male	Han	67	6.51	4.3	1.48	1.09	4.97	2.32	1.14	1.09	3.63	1.54	1.23	0.98	1.34	0.58	176.37	292.34	3.83	1.23	29.1
C/T	C/A	male	Han	57	7.32	5.41	1.29	1.27	4.73	3.82	0.9	0.84	3.22	2.76	0.9	0.94	0.92	0.81	255.42	29	3.83	2.98	14.7
C/T	C/C	female	Han	70	5.84	6.44	1.83	2.29	5.23	4.88	1.4	1.45	3.12	2.92	1.57	1.61	0.99	0.81	151.39	83.2	3.83	3.43	9.23
C/C	C/C	female	Han	62	5.5	5.34	1.15	0.97	4.84	4.53	1	0.67	3.65	3.16	0.93	1.07	0.9	1.23	151	177	3.84	3.86	18.2
C/T	C/C	female	Han	53	11.57	5.15	1.73	1.35	5.2	3.93	1.36	1.1	3.49	2.59	1.45	1.13	1.07	0.64	152.38	111.45	3.84	2.83	29.85
C/C	C/C	female	Han	59	4.86	4.92	1	1.19	5.21	3.72	1.36	1.38	3.59	2.05	1.38	1.53	1.06	0.7	94	41.1	3.85	2.34	23.3
C/C	C/C	female	Han	54	8.87	11.71	1.08	0.78	4.88	3.83	1.02	1.25	3.39	2.49	1.02	1.08	1.11	0.71	151.5	95.1	3.86	2.58	12.2
C/T	C/C	male	Han	67	4.22	4.91	1.76	1.83	4.75	2.36	0.89	0.92	3.25	1.19	1	0.92	1.03	0.43	462.65	783.11	3.86	1.44	37.2
C/C	C/C	female	Han	68	4.77	4.44	3.13	1.72	4.95	3.08	1.08	0.96	3.21	1.69	1.25	1.16	1.2	0.89	443	628.65	3.87	2.12	34.4
C/T	C/C	male	Han	41	4.48	5.28	2.45	11.23	4.91	4.86	1.03	0.81	3.28	1.24	1.27	1.29	1.1	0.6	82.81	335	3.88	4.05	20.7
C/C	C/C	male	Han	60	6.58	7.18	1.85	1.3	5	3.16	1.11	0.82	3.53	1.9	1.32	0.93	1.54	0.8	1047.5	882.6	3.89	2.34	8.4
T/T	C/C	male	Han	63	4.89	4.21	1.22	1.67	4.92	4.52	1.02	0.94	3.36	2.89	1.11	0.93	0.91	1	134	40.3	3.9	3.58	151.9
T/T	C/A	male	Han	80	5.21	5.65	1.08	1.27	4.83	4.44	0.91	0.85	3.58	3.16	0.93	0.93	1.18	0.87	275.2	337	3.92	3.59	6.5
C/T	C/C	male	Han	66	4.6	6.02	1.94	1.27	5.34	5.48	1.41	1.18	3.45	3.91	1.4	1.2	1.11	1.01	107.8	186.5	3.93	4.3	28.1
C/T	C/C	male	Han	40	4.42	5.1	1.29	1.49	5.16	3.1	1.23	1.03	4.09	2.23	1.09	0.99	1.12	0.72	292.25	192.88	3.93	2.07	29.37
C/C	C/C	male	Han	61	5.17	8.57	1.65	1.04	4.65	3.04	0.72	0.78	3.59	1.71	0.85	1.41	0.67	0.92	26.6	118.6	3.93	2.26	41.5
C/T	C/C	male	Han	68	4.76	7.85	3.72	1.64	4.72	3.2	0.78	0.84	3.24	2	1.09	1.04	1.07	0.69	96.2	194.57	3.94	2.36	25.7
C/T	C/C	male	Han	69	7.3	18.62	1.51	1.96	4.85	3.33	0.9	0.7	3.37	2.09	1.09	0.98	1.13	0.8	654.36	749.05	3.95	2.63	44.6
C/T	C/C	male	Han	77	9.59	5.09	0.69	0.71	5.74	3.62	1.78	1.36	3.14	2.12	1.59	1.28	1.02	0.81	172.86	284.54	3.96	2.26	24.72
C/C	C/C	female	Han	83	7.05	8.68	2.19	3.23	4.86	4.37	0.9	1.18	2.71	2.54	1.2	1.17	0.87	1.03	306.9	309.5	3.96	3.19	11.66
C/T	C/C	male	Han	40	4.09	3.38	2.01	1.08	5.07	2.71	1.1	1.08	3.53	1.25	1.31	1.25	1.13	0.91	139.84	149.94	3.97	1.63	19.3
C/T	C/C	male	Han	46	5.43	5.3	2.12	2.06	4.64	2.75	0.66	0.98	3.5	1.74	0.63	1.06	1.17	0.66	835.93	400.78	3.98	1.77	106.09
C/C	C/C	male	Han	51	12.41	13.24	6.47	3.56	4.74	3.31	0.76	0.63	2.57	2.15	0.97	0.85	0.85	0.67	499.94	542.4	3.98	2.68	25.29
C/T	C/C	male	Han	75	10.36	11.66	1.76	1.63	4.77	5.39	0.78	1.41	3.34	3.93	0.95	1.16	0.8	1.22	87.8	69.64	3.99	3.98	16.8
C/T	C/C	male	Han	55	5.43	6.41	2.82	2.41	4.88	4.24	0.89	0.9	3.35	2.69	1.22	1.05	1.04	1.03	117.76	57.5	3.99	3.34	101.5
C/T	C/C	male	Han	76	4.56	5.32	1.72	1.7	4.99	4.52	1	1.16	3.54	2.96	1.15	1.38	1.12	0.9	132.4	90.1	3.99	3.36	22
T/T	C/C	male	Han	36	4.41	4.59	1.9	2.8	4.9	3.12	0.9	0.94	3.78	1.99	0.84	0.87	1.01	0.64	151	313.3	4	2.18	51.8
C/T	C/C	male	Han	49	4.92	5.28	2.15	1.95	4.91	2.97	0.9	1.13	3.45	1.89	1.2	1.24	1.47	0.57	85.69	172.34	4.01	1.84	54.9
C/C	C/C	male	Han	52	5.07	4.38	2.16	1.65	5.56	4.16	1.55	1.15	3.44	2.66	1.39	1.73	1.23	1.1	160	140.32	4.01	3.01	47
C/T	C/C	male	Han	40	12.81	9.6	1.38	1.68	5.01	3.49	0.97	0.87	3.63	2.28	1.08	1.08	1.15	0.92	75.2	137.4	4.04	2.62	75.9
C/T	C/C	male	Han	55	7.73	4.76	1.5	0.99	5.06	4.08	1.01	1.01	3.59	2.34	1.38	1.02	0.97	0.71	113.6	149.7	4.05	3.07	22.8
C/C	C/C	female	Han	76	4.58	4.01	1.18	0.98	5	2.81	0.95	0.98	3.82	1.89	1.01	0.66	1.16	1.07	30.1	48.6	4.05	1.83	8.9
C/C	C/C	male	Han	40	5.96	5.22	3.3	1.76	5.08	3.39	1.03	1.43	3.52	1.82	1.17	1.5	1.38	0.76	77.6	13.9	4.05	1.96	16.5
C/C	C/C	female	Han	54	7.79	4.47	0.55	1.17	5.24	2.88	1.19	1.11	3.8	2.01	1.2	1.09	1.06	0.68	228.1	124.58	4.05	1.77	15.03
C/C	C/C	male	Han	68	4.79	5.38	2.29	0.91	5.12	2.86	1.06	0.93	3.38	1.41	1.12	1.09	0.88	0.54	41	87.2	4.06	1.93	21.7
C/T	C/C	male	Han	50	5.15	5.06	0.63	1.09	4.93	4.6	0.86	1.16	3.59	3.46	0.82	1.11	1.02	1.04	81.2	112.05	4.07	3.44	22.8
C/T	C/C	female	Han	73	10.44	3.3	1.66	1.39	5.05	4.28	0.97	0.93	3.67	3.18	1.22	1.03	1.13	0.93	805.43	613.16	4.08	3.35	10.1
C/C	C/C	female	Han	75	11.59	6.35	3.99	4.37	5.58	4.13	1.5	0.88	3.86	2.18	1.58	1.23	1.35	0.79	283.59	202	4.08	3.25	87.91
C/T	C/C	male	Han	63	7.26	4.06	2.31	2.25	5.1	3.9	1	0.9	3.59	2.66	1.16	1.29	0.93	0.85	21.3	226.7	4.1	3	14.12
C/C	C/C	female	Han	72	11.3	16.27	3.17	1.95	5.37	3.76	1.27	1.62	3.25	2.16	1.53	1.36	1.28	0.8	68.2	239.21	4.1	2.14	20.1
C/C	C/C	female	Han	61	4.36	4.04	0.94	1.39	5.66	5.12	1.55	1.44	3.73	3.29	1.47	1.57	1.2	1.05	607.3	401	4.11	3.68	10
C/T	C/C	female	Han	56	5.19	4.97	1.11	1.47	5.74	5.2	1.63	1.38	3.85	3.19	1.58	1.76	1.05	0.85	73.4	34	4.11	3.82	7.6
C/T	C/C	female	Han	60	8.08	7.68	2.13	2.31	5.12	5.39	1.01	1.01	3.31	3.83	1.17	1.26	1.02	1.51	103.3	66	4.11	4.38	37
C/C	C/C	male	Han	63	5.49	5.32	1.96	1.52	5.23	3.25	1.12	1.09	3.11	1.65	1.26	1.19	1.11	0.59	31.9	86.4	4.11	2.16	12.39
C/C	C/C	female	Han	72	4.57	4.32	1.47	1.61	5.31	3.09	1.19	1.06	3.77	1.7	1.31	1.21	1.13	0.79	233.6	301.4	4.12	2.03	11.3
C/T	C/C	male	Han	74	5.39	5.22	2	1.7	4.93	3.11	0.81	0.37	3.38	1.89	1.16	0.42	1.2	0.67	185	496.7	4.12	2.74	6.99
C/T	C/C	male	Han	70	11.52	7.68	2.48	1.2	5.06	3.75	0.94	0.95	3.76	2.12	1.23	1.05	1.2	0.89	275.34	76.96	4.12	2.8	35.35
C/C	C/C	male	Han	62	4.68	4.65	1.03	0.84	5.29	3.26	1.17	1.03	4.47	2.07	1.23	1.02	1.06	0.7	154	302.3	4.12	2.23	26.4
C/T	C/C	male	Han	56	12.09	12.72	12.14	12.21	5.17	4.91	1.03	0.64	2.55	1.45	0.95	1.29	0.63	0.78	1139.71	469.9	4.14	4.27	24.96
T/T	C/C	female	Han	60	5.45	4.94	2.93	1.51	5.08	3.19	0.94	0.92	3.58	1.86	1.06	0.98	1.13	0.66	236.2	220.2	4.14	2.27	23.52
T/T	C/A	male	Han	56	8.16	7.82	2.37	4.15	4.97	3.8	0.82	0.6	3.57	2.29	0.96	0.79	1.23	0.97	35.8	39.6	4.15	3.2	85
C/T	C/C	male	Han	69	5.77	9.06	1.21	1.58	5.32	3.79	1.17	1.03	3.02	2.55	1.21	1.39	1.25	0.73	172.3	261.33	4.15	2.76	11.04
C/T	C/C	male	Han	63	5.48	4.6	1.56	0.38	5.03	2.28	0.88	1.1	3.87	1.07	1.05	1.09	1.35	0.48	78.5	37.8	4.15	1.18	22.3
C/C	C/C	male	Han	47	5.31	8.77	1.69	1.63	5.24	3.83	1.09	1.05	2.8	1.11	1.11	1.41	1.28	0.84	164.4	210	4.15	2.78	27.5
C/C	C/C	male	Han	50	4.86	5.07	1.99	1.81	5.02	3.11	0.86	0.87	3.62	1.95	1.02	1.05	1.2	0.88	80.6	30.9	4.16	2.24	33.6
C/T	C/C	male	Han	47	5.91	5.22	4.67	4.63	5.11	4.82	0.95	0.89	2.91	2.69	1.24	1.26	1.1	1.06	47.1	36.2	4.16	3.93	39.1
C/T	C/A	female	Han	63	21.5	7.29	5.7	3.49	5.24	5.26	1.07	0.89	3.23	3.32	1.18	1.08	0.98	1.22	878.59	517.8	4.17	4.37	20.73
C/C	C/C	male	Han	56	5.09	4.97	1.7	1.23	5.27	3.08	1.09	0.9	3.78	1.76	1.13	1.26	1.22	0.62	920.5	420	4.18	2.18	13.2
C/T	C/C	male	Han	64	13.5	5.87	9.59	3.76	5.03	4.53	0.84	0.91	2.64	2.98	1.08	1.18	0.71	0.81	1168.39	228.9	4.19	3.62	20.49
C/T	C/C	female	Han	67	5.3	6.42	1.97	2.65	5.49	5.28	1.3	1.21	3.68	3.38	1.39	1.39	1.2	0.9	234	420.75	4.19	4.07	78.7
C/T	C/C	male	Han	43	4.55	4.66	2.59	1.72	5.08	4.34	0.87	0.93	3.36	2.91	1.03	1.01	1.09	0.9	93.84	67.6	4.21	3.41	32.7
C/T	C/C	male	Han	79	5.88	3.53	1.16	1.26	5.19	4.22	0.98	0.83	3.46	2.77	1.03	0.9	1.25	0.7	158.8	155	4.21	3.39	20.3
C/C	C/C	male	Han	51	6.01	15.09	3.53	3.47	4.87	4.26	0.65	0.67	3.15	2.57	0.92	1.35	1.19	0.94	78.3	117.2	4.22	3.59	10.4
C/T	C/C	male	Han	45	4.34	5.22	1.21	0.62	5.73	3	1.51	1.48	4.27	1.91	1.4	1.33	1.29	0.61	200.32	126.57	4.22	1.52	14.08
C/C	C/C	male	Han	56	6.53	5.74	1.48	2.24	4.82	4.3	0.58	0.88	3.98	2.89	0.92	1.17	1.44	0.8		64	4.24	3.42	19.1
C/T	C/C	male	Han	66	5.16	4.97	1.51	1.19	5.13	3.24	0.89	1.03	3.75	1.98	0.95	1.01	1.22	0.68	237.05	116.32	4.24	2.21	15.9
C/T	C/C	female	Han	65	10.75	6.67	2.89	1.39	5.07	2.64	0.8	0.86	3.14	1.43	0.93	1.04	1.04	0.82	121.83	13.61	4.27	1.78	15
C/C	C/C	female	Han	74	6.79	6.75	3.34	2.65	5.59	3.92	1.31	1.39	4.3	1.89	1.18	1.44	1.18	0.73	233.76	44.3	4.28	2.53	18.22
C/C	C/C	male	Han	45	5.31	5.56	1.66	0.89	5.07	3.1	0.79	0.88	3.47	1.98	1.26	1.18	1.32	0.56	15	211	4.28	2.22	33.4
C/C	C/C	male	Han	60	5.08	7.52	1.74	1.82	5.76	5.45	1.47	0.85	4.12	3.39	1.39	1.25	1.27	1.09	662.2	403.01	4.29	4.6	28.2
C/T	C/C	male	Han	72	7.58	4.22	1.57	1.12	5.37	3.5	1.07	1.26	3.76	2.17	1.1	1.21	0.93	0.79	97	28.2	4.3	2.24	12.7
C/C	C/C	male	Han	40	5.66	4	1.76	2.62	5.4	4.17	1.1	1.39	3.61	2.64	1.37	1.33	1.18	0.98	578.97	1427.7	4.3	2.78	37.4
C/C	C/C	female	Han	67	11.37	7.87	4.51	2.31	5.42	2.48	1.11	0.73	4.04	2.25	1.06	0.91	1.12	0.84	458.14	410.3	4.31	1.75	12.34
C/T	C/C	female	Han	67	4.79	4.8	2.92	4.05	5.5	5.22	1.19	0.94	3.47	2.57	1.41	1.32	1.39	0.89	230.21	142.73	4.31	4.28	19.2
C/C	C/C	female	Han	75	6.27	6.58	1.53	1.36	5.41	3.23	1.09	1.24	3.51	1.77	1.31	1.45	1.24	1.01	282	332	4.32	1.99	15
C/C	C/C	female	Han	59	4.11	7.64	1.75	0.73	5.55	3.38	1.23	1.28	3.85	2.02	1.28	1.39	1.26	0.67	284.4	787.2	4.32	2.1	25.5
C/C	C/C	male	Han	74	5	4.27	2.21	2.07	5.89	4.79	1.56	1.29	3.9	2.96	1.39	1.57	1.23	0.99	381.6	682.52	4.33	3.5	11.7
C/C	C/C	male	Han	61	6.79	9.94	1.99	1.36	5.19	3.15	0.85	0.69	3.42	1.6	1.03	1.49	0.77	0.64	90.2	132.8	4.34	2.46	23
C/C	C/C	male	Han	56	8	7.15	1.6	1.48	5.16	4.79	0.8	0.92	4.16	3.35	0.76	0.98	1.3	1.26	970.89	566	4.36	3.87	145.13
C/T	C/C	female	Han	76	5.42	6.48	1.5	1.28	5.86	4.52	1.49	1.65	4.05	2.55	1.13	1.02	1.53	1.47	126.1	201.4	4.37	2.87	22
C/T	C/C	female	Han	75	5.72	6.18	1.25	1.37	5.14	3.41	0.75	0.95	3.3	2.07	0.96	1.15	0.9	0.58	272.21	298.6	4.39	2.46	15.49
C/C	C/C	female	Han	49		5.15	2.26	1.32	5.39	3.65	1	1.11	4.06	2.37	1.2	1.06	1.15	0.65	543.8	869.5	4.39	2.54
C/C	C/C	female	Han	71	5.7	11.36	1.95	2.39	5.81	4.66	1.41	1.17	3.58	2.86	1.47	1.77	1.08	1.07	207	429	4.4	3.49	12.4
T/T	C/C	male	Han	66	6.2	6.9	0.89	1.78	5.56	3.79	1.16	1.37	3.34	2.04	1.39	1.48	1.16	0.6	93	81	4.4	2.42	14.7
C/T	C/C	male	Han	72	6.4	7.09	3.67	2.17	5.83	3.83	1.42	0.96	3.39	2.29	1.55	1.07	1	0.85	112	210.18	4.41	2.87	22.5
C/C	C/C	male	Han	71	4.93	4.7	1.24	0.91	5.65	3.69	1.23	1.04	3.89	2.41	1.05	1.2	1.32	0.65	34.6	75.2	4.42	2.65	28.5
C/C	C/C	male	Han	46	4.82	4.89	1.64	5.61	5.41	4.62	0.99	0.79	3.72	2.68	0.98	1.13	1.18	0.79	467.4	172	4.42	3.83	39.4
C/T	C/C	male	Han	48	6.88	6.12	2.1	1.81	5.55	4.38	1.13	1.35	4.07	2.97	1.36	1.28	1.47	1.02	191.6	256.3	4.42	3.03	32.4
C/C	C/C	male	Han	45	7.43	5.77	3.02	3.03	5.49	4.03	1.07	0.74	3.96	2.17	1.33	1.02	1.15	0.78	320.67	130	4.42	3.29	27.35
C/C	C/C	female	Han	62	5.53	6	1.55	1.89	6.16	4.06	1.71	1.24	4.18	2.35	1.46	1.32	1.22	0.77	82.5	45.2	4.45	2.82	8.7
C/T	C/C	male	Han	61	5.08	4.73	1.2	1.47	5.33	4.16	0.87	0.93	4.12	2.8	1.02	1.13	1.51	1.35	55.5	29.5	4.46	3.23	27
C/T	C/A	female	Han	62	5.03	3.73	2.29	2.44	5.43	2.58	0.97	0.72	3.9	1.11	1.15	1.03	1.33	0.44	237.43	149	4.46	1.86	17.3
C/T	C/C	female	Han	62	5.15	5.61	1.96	1.57	5.41	3.67	0.94	1.18	3.91	2.46	1.29	1.26	1.31	0.86	238.48	422.01	4.47	2.49	15.5
C/C	C/C	male	Han	43	4.3	4.37	2.18	3.13	5.35	5.36	0.86	1.02	4	3.61	0.98	1.21	1.47	1.25	170.9	129.7	4.49	4.34	50.8
C/C	C/C	female	Han	69	4.54	4.92	1.29	1.36	5.96	6.47	1.47	1.46	4.15	4.29	1.32	1.27	1.26	1.19	147.9	151.37	4.49	5.01	3.3
C/T	C/C	male	Han	54	4.82	4.71	3.68	3.32	5.58	4.74	1.08	1.47	3.6	3.18	1.32	1.41	1.09	1.06	284.39	912.3	4.5	3.27	21.7
C/C	C/C	female	Han	62	6.84	6.02	1.84	1.12	5.69	3.29	1.19	1.53	3.86	1.6	1.31	1.47	1.16	0.63	151.1	96.3	4.5	1.76	11.3
C/T	C/C	male	Han	79	5.77	8.97	1.87	3.23	5.34	3.98	0.84	0.77	3.78	2.48	1	1.13	0.96	0.82	22	43.5	4.5	3.21	12.6
C/T	C/C	male	Han	75	7.6	5.22	3.25	1.11	5.37	2.77	0.87	0.97	3.61	1.49	0.97	1.1	1.17	0.68	50.2	83.1	4.5	1.8	14.4
C/C	C/C	female	Han	47	6.65	7.67	4.86	5.14	5.54	5.33	1.04	0.85	4.15	2.36	1.38	0.86	1.32	0.89	506.4	296.51	4.5	4.48	15.9
C/T	C/C	female	Han	74	7.64	5.8	1.62	1.06	5.67	3.03	1.15	1.35	3.79	1.49	1.23	0.56	0.98	1.32	758	909.9	4.52	1.68	10
C/T	C/C	female	Han	67	5.97	9.53	2.59	2.68	5.45	4.4	0.92	1.29	3.59	2.62	1	1.43	1.19	0.99	54	80.3	4.53	3.11	8.9
C/T	C/C	female	Han	42	5.04	6.17	1.52	1.96	6.11	5.78	1.57	1.39	4.22	3.97	1.34	1.36	1.27	1.23	71.33	168.79	4.54	4.39	12.5
C/C	C/C	male	Han	40	5.79	4.66	4.07	2.56	5.34	2.87	0.79	0.94	3.72	1.38	1.05	0.99	1.47	0.7	99.8	81.1	4.55	1.93	29.13
C/C	C/C	male	Han	34	5.84	5.16	1.46	0.93	5.74	3.31	1.19	0.92	4.57	2.54	1.06	0.96	1.4	0.77	186.41	245.7	4.55	2.39	31.29
T/T	C/C	male	Han	48	4.77	5.37	2.53	3.3	5.64	5.34	1.08	0.87	3.86	3.53	1.28	1.09	1.29	1.22	50.11	447.21	4.56	4.47	75.5
C/C	C/C	male	Han	41	6.09	5.65	3.74	0.72	5.26	3.49	0.7	0.82	3.56	2.61	0.75	0.66	0.83	0.82	107.37	248.77	4.56	2.67	51.95
C/T	C/C	female	Han	71	7.65	4.61	2.72	1.27	5.56	3.79	0.99	1.13	3.63	2.48	1.36	1.16	1.3	0.86	73.62	64.2	4.57	2.66	15.46
C/C	C/C	male	Han	62	5.14	5.23	3.02	1.12	5.55	3.21	0.98	0.81	3.6	2.14	1.57	0.93	1.1	0.72	265.42	270.68	4.57	2.4	33.69
C/T	C/C	male	Han	54	18.26	15.94	2.94	2.61	5.7	2.91	1.12	0.89	4.23	1.84	1.38	1.25	1.11	0.54	254.74	275.67	4.58	2.02	25.75
C/T	C/C	male	Han	79	6.03	7.58	1.37	1.35	5.68	3.57	1.09	0.77	4.09	2.47	1.39	1.05	1.2	0.88	315.39	301.7	4.59	2.8	14.1
C/T	C/A	male	Han	63	5.25	4.13	2.75	2.03	5.59	3.79	0.99	0.85	4.33	2.39	1.08	1.07	1.04	0.85	106	129.02	4.6	2.94	26
C/C	C/C	male	Han	64	4.58	4.69	3.1	1.98	5.97	3.95	1.37	1.02	4.08	2.52	1.06	1.3	1.43	0.8	208.89	125	4.6	2.93	13.28
T/T	C/C	male	Han	61	6.47	4.94	5.47	1.88	5.81	2.7	1.19	0.62	2.98	1.46	1.28	0.76	0.96	0.66	80.61	112.12	4.62	2.08	45.73
C/C	C/C	male	Han	47	6.95	6.05	6.36	2.93	5.78	4.59	1.16	1.39	3.84	3.19	1.29	1.32	1.17	0.99	295	951.2	4.62	3.2	16.4
C/T	C/C	female	Han	64	7.22	5.55	1.25	1.18	6.24	4.13	1.62	1.01	4.22	2.81	1.41	1.16	1.21	0.89	118.8	102.6	4.62	3.12	77
C/T	C/C	male	Han	68	4.03	4.5	1.71	2.29	5.53	4.67	0.9	0.98	4.4	3.03	1.01	1.24	1.36	1	862.24	569.5	4.63	3.69	13.4
T/T	C/C	female	Han	56	5.12	4.42	1	1.63	5.73	4.06	1.07	0.9	4.58	2.71	1.23	1.09	1.33	0.81	75	71.8	4.66	3.16	21.1
C/T	C/A	female	Han	61	5.47	5.11	1.71	1.84	5.95	3.29	1.28	1.28	4.19	1.53	1.28	1.39	1.04	0.55	37.8	23.9	4.67	2.01	11.4
T/T	C/C	female	Han	49	4.75	4.28	1.81	2.61	5.54	3.79	0.87	0.97	4.16	2.11	1.15	1.12	1.38	0.82	160	141.16	4.67	2.82	10.6
T/T	C/C	male	Han	52	4.63	4.62	2.71	1.89	5.74	5.38	1.05	0.89	4.17	4.08	1.36	1.04	1.42	1.43	48.63	19.2	4.69	4.49	19.7
C/T	C/C	male	Han	45	5.53	4.45	2.87	2.68	5.94	5.75	1.24	0.69	4.41	4	1.24	0.93	1.42	1.19	214.4	167.19	4.7	5.06	39.2
C/C	C/C	male	Han	48	3.52	3.59	3.41	3.67	5.57	3.56	0.85	0.78	3.79	1.8	1.38	1.28	1.23	0.6	71.95	36	4.72	2.78	60.6
C/C	C/C	female	Han	59	4.99	4.47	2.84	3.42	5.58	5.09	0.85	1.3	4.38	2.52	1.4	1.23	1.25	1.23	67.3	67.7	4.73	3.79	22.54
C/T	C/C	male	Han	48	4.33	12.93	1.67	3.64	5.66	6.39	0.86	0.88	4.34	4.16	0.97	1.24	1.54	1.44	132.5	109.45	4.8	5.51	29.1
C/C	C/C	female	Han	56	6.42	6.47	3.66	3.19	6.01	3.98	1.21	1.1	3.94	2.15	1.41	0.99	1.19	1.31	499.3	519.3	4.8	2.88	28.6
C/T	C/C	male	Han	51	4.53	4.26	1.94	2.17	5.64	3.67	0.8	0.94	3.55	2.13	1.37	1.23	1.19	0.62	52.2	101	4.84	2.73	16.73
C/C	C/C	male	Han	45	5.54		3.52		5.48		0.64		3.26		1.25		1.3		190.38		4.84	0	17.9
C/C	C/C	male	Han	72	10.85	14.73	1.88	4.81	6.08	5.76	1.22	0.81	4.16	3.3	1.44	1.13	1.11	1	87.1	94.43	4.86	4.95	23.2
C/C	C/C	male	Han	41	9.58	6.06	7.48	4.23	5.8	4.43	0.93	0.9	3.76	2.83	1.12	1.31	1.14	0.84	623.72	195.88	4.87	3.53	44.75
T/T	C/C	female	Han	73	6.91	8.52	2.54	1.61	6.07	4.42	1.2	1.16	4.16	2.45	1.43	1.36	1.25	0.76	168.9	346	4.87	3.26	25.6
C/C	C/C	female	Han	68	6	7.22	2.08	1.54	5.71	4.15	0.83	1.16	3.61	2.32	1.13	1.39	1.12	0.73	207.35	109.47	4.88	2.99	36.2
C/C	C/C	female	Han	67	9.25	8.97	1.64	1.53	6.27	3.25	1.38	0.89	4.48	1.7	1.49	1.21	1.34	0.54	71.8	94.29	4.89	2.36	6，80
C/T	C/C	female	Han	65	5.69	4.6	1.3	1.45	6.54	4.88	1.64	1.46	4.95	2.91	1.57	1.69	1.06	0.94	107.36	98.51	4.9	3.42	7.3
C/C	C/C	male	Han	52	5.08	6.11	3.22	0.74	5.74	2.16	0.84	0.85	3.81	1.2	1.14	0.95	1.06	0.47	66.4	51.86	4.9	1.31	21.7
C/T	C/C	male	Han	60	4.24	7.2	1.15	3.23	5.5	5.32	0.59	0.77	4.66	3.89	0.71	0.9	1.28	1.16	205.82	145.08	4.91	4.55	42.68
T/T	C/C	male	Han	49	4.87	5.37	2.38	1.47	5.74	3	0.82	1.1	3.82	1.79	1.04	1.12	1.15	0.71	489.4	850.4	4.92	1.9	89.7
C/C	C/C	male	Han	43	4.5	4.16	4.41	1.81	5.79	3.51	0.86	1.08	3.74	2.46	1.27	0.97	1.36	0.89	79	274.71	4.93	2.43	40.6
C/T	C/C	female	Han	68	14.56	7.36	1.5	0.91	6.14	3.54	1.2	1.31	4.49	1.9	1.23	1.37	1.29	0.63	427.73	758.55	4.94	2.23	9.98
T/T	C/A	male	Han	56	13.77	8.62	3.85	3.74	5.85	4.81	0.91	0.82	4.17	2.89	1.07	0.88	1.24	1.14	664.7	492.9	4.94	3.99	12
C/T	C/C	male	Han	48	9	5.05	3.65	1.12	5.96	2.63	1.01	1.12	4.1	1.49	1.08	1.06	1.16	0.58	431.53	37.3	4.95	1.51	27.06
C/T	C/C	male	Han	44	5.27	6.27	1.44	2.96	6.14	4.4	1.18	0.82	4.84	3.48	1.09	1	1.45	0.89	660.08	1282.4	4.96	3.58	55.63
C/C	C/C	female	Han	64	4.4	4.63	3.87	3.75	6.19	6.42	1.23	1.28	3.92	3.69	1.46	1.44	1.07	1.18	41	36	4.96	5.14	22.2
C/C	C/C	female	Han	68	5.44	4.88	1.28	0.97	6.68	5.17	1.71	1.43	4.57	3	1.44	1.32	1.13	0.85	101	58	4.97	3.74	23
C/T	C/C	male	Han	61	4.75	3.88	1.65	0.96	6.49	3.29	1.5	1.43	4.77	2.14	1.58	0.69	1.54	1.32	52.9	36.1	4.99	1.86	21.9
C/C	C/C	male	Han	56	4.24	5.08	3.1	1.43	5.87	3.41	0.86	0.97	3.79	1.99	1.2	1.06	1.8	0.79	174.06	143.41	5.01	2.44	16.7
C/C	C/C	female	Han	49	5.51	7.58	5.76	3.8	6.17	5.32	1.11	0.96	2.71	2.59	1.34	1.65	1.02	0.89	90	86.7	5.06	4.36	16
C/T	C/C	female	Han	78	10.26	11.43	2.29	1.46	6.43	4.08	1.34	0.75	4.42	2.36	1.32	0.63	1.11	0.9	96	71.81	5.09	3.33	18
C/T	C/C	male	Han	67	10.62	6.31	3.77	3.23	6.04	6.11	0.94	0.95	4.06	3.85	1.35	1.28	1.16	1.11	33.13	35.07	5.1	5.16	20.4
C/C	C/C	female	Han	64	4.13	5.27	6.02	7.69	6.05	6.69	0.95	0.97	3.11	4.02	1.35	1.33	1.04	1.02	177.11	152	5.1	5.72	19.9
C/T	C/C	female	Han	64	5.2	4.92	3.49	2.58	6.12	4.57	1	0.95	4.05	2.97	1.3	1.31	1.21	1	128.32	109.27	5.12	3.62	20
C/C	C/C	male	Han	43	5.15	5.33	0.84	0.96	5.99	3.95	0.86	0.86	4.56	3.13	0.81	1.01	1.61	0.97	831.9	1025.4	5.13	3.09	55
C/C	C/C	female	Han	78	4.93	5.37	1.56	2.29	6.03	4.38	0.9	0.97	4.59	2.78	1.22	1.17	1.82	0.62	252.85	85.73	5.13	3.41	17.7
C/C	C/C	female	Han	55	5.84	9.14	2.28	2.04	6.02	4.07	0.89	1.17	4.54	2.56	1.03	1.37	1.37	0.9	79.5	61.1	5.13	2.9	12.2
C/C	C/C	male	Han	51	5.12	4.71	3.05	4.5	6.3	5	1.16	0.67	4.54	2.41	1.23	1.44	1.35	1.11	48.8	54.49	5.14	4.33	30.6
C/C	C/C	male	Han	61	6.47	4.43	3.14	1.98	6.14	3.58	1	0.87	4.17	2.23	1.33	0.72	1.07	1.21	222.12	86.1	5.14	2.71	52.45
C/T	C/C	female	Han	57	5.01	11.15	1.73	1.11	6.23	2.79	1.08	1.41	4.9	1.88	1.38	1.27	1.33	0.6	147.92	182.71	5.15	1.38	45.62
C/C	C/C	male	Han	45	5.47	5.64	6.1	1.5	5.96	3.28	0.76	1.06	2.88	1.91	1.11	1.42	1.88	0.7	128.7	87.44	5.2	2.22	80.6
C/T	C/C	female	Han	71	11.85	10.8	1.77	1.73	6.36	4.5	1.15	1.11	4.54	2.63	1.23	1.26	1.52	0.97	71.1	62.6	5.21	3.39	18.4
C/C	C/C	male	Han	68	4.79	6.54	1.25	0.63	6.19	5.61	0.93	1.11	4.17	4.02	1.14	1.55	1.36	0.89	297	280.9	5.26	4.5	9.8
C/C	C/C	female	Han	59	4.55	6.58	0.74	0.84	6.77	7.2	1.49	1.46	5.12	4.79	1.31	1.36	1.09	1.16	1.31	164.59	5.28	5.74	22.6
C/C	C/C	male	Han	74	13.69	8.72	2.34	1.05	6.54	3.26	1.24	1.39	4.19	1.85	1.39	1.26	1.05	0.74	366.01	77.9	5.3	1.87	10.37
C/T	C/C	male	Han	50	6.45	13.49	2.09	1.64	6.08	5.22	0.76	0.95	4.92	4.03	0.92	1.03	1.61	1.29	1229.2	561.27	5.32	4.27	56.4
T/T	C/C	male	Han	55	6.88	9.91	2.22	2.07	6.06	5.04	0.71	0.8	4.56	3.47	0.89	1.07	1.53	1.19	119.2	138.4	5.35	4.24	95.1
C/T	C/C	female	Han	71	4.46	4.22	3.06	2.11	6.66	6.34	1.25	1.38	4.4	5.04	1.39	1.65	1.36	1.22	986	1544	5.41	4.96	17.2
C/T	C/C	male	Han	52	8.79	11.3	2.83	2.18	6.56	4.57	1.14	1.21	4.58	3.23	1.28	1.44	1.56	0.85	87.6	80	5.42	3.36	42.3
C/C	C/C	male	Han	43	7.34	6.51	3.84	1.25	6.29	4.21	0.87	0.92	3.91	2.23	1.32	1.22	1.16	0.9	1046.07	670.42	5.42	3.29	31.64
C/T	C/C	male	Han	51	13.82	12.12	2.39	0.85	6.19	2.3	0.76	0.88	4.35	1.11	1.45	1.02	1.41	0.37		130.73	5.43	1.42	27.5
C/T	C/C	female	Han	76	9.24	11.04	5.44	4.27	6.58	4.34	1.12	1.02	3.54	2.61	1.53	1.08	1.5	0.88	108.1	112.02	5.46	3.32	22.7
C/T	C/C	female	Han	71	4.85	5.22	0.61	0.57	6.78	3.76	1.31	1.14	5.12	2.64	1.23	1.19	1.59	0.93	129.57	92.13	5.47	2.62	11.2
C/C	C/C	male	Han	55	15.64	8.64	2.35	2.67	6.43	4.97	0.93	1.09	4.79	3.71	1.06	1.14	1.83	1.15	71.67	197.4	5.5	3.88	13.2
C/T	C/C	female	Han	70	5.85	5.43	1.79	1.11	6.4	4.02	0.9	0.91	4.78	2.8	1.19	0.98	1.33	0.9	412.3	106	5.5	3.11	12.13
C/T	C/C	male	Han	73	6.22	6.32	4.97	1.11	6.24	3.77	0.74	1.26	3.95	2.5	1.38	1.04	1.13	0.54	263.3	207.88	5.5	2.51	28
C/C	C/C	male	Han	76	7.02	8.96	5.98	3.51	6.61	3.54	1.1	0.45	3.09	1.75	1.44	0.74	1.42	0.82	48	83.6	5.51	3.09	61.1
C/T	C/A	female	Han	75	8.88	6.38	1.35	3.69	6.53	4.72	0.95	0.87	4.23	2.77	1.07	1.4	1.36	1.02	264.59	184.07	5.58	3.85	18.59
C/C	C/C	female	Han	51	4.93	15.72	5.17	10.29	6.58	5.77	0.98	0.8	3.89	1.7	1.39	1.38	1.2	1.03	175.28	276.17	5.6	4.97	19
C/T	C/A	male	Han	46	6.67	5.91	4.51	1.77	6.03	3.77	0.43	0.75	4.27	2.53	1.48	1.23	1	0.82	240.3	77	5.6	3.02	32.1
C/T	C/C	male	Han	57	9.21	7.21	4.33	1.36	6.73	4.51	1.1	1.03	3.9	3.2	1.48	1.23	1.04	1.08	147	455	5.63	3.48	15.2
C/C	C/C	male	Han	31	7.46	3.98	1.81	0.82	6.79	3.65	1.09	1.17	4.53	2.24	1.58	1.22	1.31	0.69	168.22	210.02	5.7	2.48	37.74
C/T	C/C	male	Han	42	9.62	8.01	5.13	4.1	6.68	5.27	0.93	0.53	4.85	3.56	1.23	0.84	1.67	1.33	279.34	44.4	5.75	4.74	27.5
C/T	C/C	male	Han	74	10.42	5.14	2.23	1.92	7.7	4.57	1.87	1.19	5.89	2.76	1.49	1.4	1.67	1.01	73.8	104.93	5.83	3.38	21.7
C/C	C/C	male	Han	52	4.51	6.39	3.83	2.78	6.86	4.03	0.87	0.68	4.7	2.13	1.07	1.36	1.25	0.87	711.2	1104.6	5.99	3.35	95.8
C/T	C/C	male	Han	38	6.28	6.72	0.92	2.7	6.72	3.91	0.73	0.92	4.99	2.51	1	1	0.91	0.89	196.9	452.5	5.99	2.99	80.3
C/T	C/C	female	Han	76	4.25	6.49	1.58	1.4	7.45	4.34	1.45	1.05	5.3	2.85	1.48	1.18	1.65	0.84	548.5	607.9	6	3.29	19.9
C/T	C/C	male	Han	74	6.25	6.77	2.75	3.2	6.79	5.25	0.74	1.51	4.97	3.63	1.01	1.54	1.66	1.13	144.87	236.68	6.05	3.74	66.4
C/C	C/C	female	Han	79	6.54	6.99	1.92	1.47	7.57	6.62	1.49	1.51	5.15	4.51	1.41	1.55	1.67	1.36	132.91	275.21	6.08	5.11	22.8
C/C	C/C	male	Han	63	7.09	8.19	3.96	1.82	7.11	5.76	0.98	1.18	4.27	4.15	1.24	1.4	1.38	1.41	157	186.77	6.13	4.58	24.3
C/T	C/C	male	Han	56	9.57		1.67	1.84	7.39	3.26	1.2	1.11	5.53	2.19	1.25	1.04	1.56	0.69	178.87	148.37	6.19	2.15	23.4
C/T	C/C	female	Han	66	5.45	6.46	1.4	1.86	7.68	8.18	1.46	1.14	5.85	6.35	1.03	1.4	1.69	1.94	228.78	385.51	6.22	7.04	39.89
C/C	C/C	male	Han	51	5.72	4.57	2.27	0.84	7.58	4.21	1.28	1.52	5.09	3.16	1.22	1.32	1.32	1	804.86	682.5	6.3	2.69	19.87
C/T	C/C	male	Han	42	6.28	9.13	3.27	2.26	7.13	6.54	0.75	1.32	5.57	3.36	1.24	1.31	1.55	1.1	96.66	246.3	6.38	5.22	26.5
C/C	C/C	female	Han	69	5.23	5.08	6.2	2.31	7.26	4.22	0.78	1.03	4.27	2.69	1.43	1.21	1.49	0.96	119.15	61.4	6.48	3.19	19.4
C/T	C/C	male	Han	39	3.96	4.64	2.37	2.81	7.37	5.78	0.77	0.71	5.46	4.01	0.77	0.98	1.59	1.4	50.3	64.68	6.6	5.07	22.9
C/T	C/C	male	Han	71	4.83	4.52	2.64	1.61	7.21	3.88	0.57	0.73	4.26	2.26	0.99	1.04	1	0.85	16.1	62	6.64	3.15	21
C/T	C/C	male	Han	53	4.72	4.89	3.43	2.23	7.69	4.42	1.02	1.23	5.22	2.76	1.31	1.51	1.69	1.1	144.25	126.13	6.67	3.19	15.5
C/T	C/C	male	Han	31	5.46	4.34	2.7	1.96	7.39	5.68	0.53	0.59	5.3	4.55	1.29	0.6	2.04	1.26	65.5	606.6	6.86	5.09	39.2
C/C	C/C	male	Han	55	4.65	5.23	3.35	2.31	8.64	7.19	0.69	1.15	6.34	5.2	1.03	1.27	2.23	1.5	151.1	72.7	7.95	6.04	36.6
C/C	C/C	male	Han	56	9.79	11.15	4.22	3.72	5.85	4.07	1.07	0.91	2.86	2.16							4.78	3.16	12.15
C/T	C/C	female	Han	55	6.52	8.25	1.97	1.51	5.73	4.42	0.73	0.96	5.1	2.77							5	3.46	9.94
T/T	C/C	female	Uyghur	64	5.68	4.73	1.32	1.44	1.32	3.34	0.73	0.89	3.05	2.59	1.05	0.68	0.95	1.04	160.54	193.07	0.59	2.45	22.49
C/T	C/C	male	Uyghur	50	5.34	7.48	2.3	1.96	1.91	3.34	1.04	0.96	3.54	2.38	1.04	0.88	1.03	0.82	476.68	599.65	0.87	2.38	19.17
C/C	C/C	male	Uyghur	53	5.43	4.75	3.06	14.23	2.02	6.93	0.64	0.58	1.19	0.89	0.72	0.98	0.34	0.71	277	726.7	1.38	6.35	72.69
T/T	C/A	female	Uyghur	45	4.39	4.32	2.17	1.86	2.35	2.49	0.79	0.63	1.46	1.19	0.98	1.02	0.63	0.56	323.55	147.4	1.56	1.86	16.94
C/T	C/C	male	Uyghur	48	5.32	11.88	1.3	3.31	2.31	4.04	0.6	0.65	1.37	2.87	0.77	0.72	0.62	0.84	114.34	247.08	1.71	3.39	18.5
C/C	C/C	female	Uyghur	57	9.19	15.74	1.68	2.25	2.9	4.38	1.18	0.99	1.88	2.62	1.31	1.23	0.58	0.85	126.43	157.6	1.72	3.39	18.5
C/T	C/C	male	Uyghur	62	5.21	4.84	1.54	3.26	2.67	4.32	0.84	0.78	1.44	2.72	1.02	1.02	0.61	1.1	433.1	229.1	1.83	3.54	18.6
C/T	C/C	male	Uyghur	64	5.23	8.4	1.69	1.1	2.88	2.36	0.88	0.92	1.52	1	1.05	0.98	0.55	0.44	838.38	441.72	2	1.44	17.2
C/T	C/C	male	Uyghur	53	6.38	3.88	2.05	2.47	3.19	2.84	1.06	0.99	2.12	1.3	1.18	1.04	0.66	0.5	69.72	63.7	2.13	1.85	145.57
C/T	C/A	male	Uyghur	55	4.96	5.27	0.85	0.98	3.45	3.14	1.3	0.7	2.26	1.89	1.12	0.75	0.69	0.84	180.07	245	2.15	2.44	36.36
C/C	C/C	male	Uyghur	55	8.32	5.22	1.44	1.13	3.25	3.97	1.05	1.08	1.98	2.66	1.39	1.16	0.71	0.76	113.07	37.11	2.2	2.89	25.48
C/C	C/C	male	Uyghur	53	5.79	6.36	0.96	2.54	3.15	5.09	0.93	1.08	1.94	3.43	0.92	1.14	0.71	1.15	125.4	50.8	2.22	4.01	39.9
C/T	C/C	female	Uyghur	65	6	6.85	1.83	3	3.15	4.67	0.92	1.16	2.36	2.92	1.14	1.19	0.48	0.75	740.86	547.85	2.23	3.51	43.56
T/T	C/C	male	Uyghur	53	13.03	11.2	0.56	0.61	3.35	2.35	1.1	0.79	2	1.51	1.19	0.52	0.82	0.83	163.3	284.31	2.25	1.56	24.9
C/T	C/C	male	Uyghur	61	5.09	5.21	0.73	1.27	3.1	4.38	0.8	0.96	1.91	2.82	0.95	1.45	0.74	0.87	97.83	124.87	2.3	3.42	45.34
C/T	C/C	male	Uyghur	53	4.18	4.05	0.65	0.77	4.02	5.08	1.66	2.07	2.37	3.37	1.47	1.5	0.77	1.05	137.73	227.83	2.36	3.01	18.1
T/T	C/C	male	Uyghur	55	6.25	13.88	1.52	3.06	3.13	3.16	0.75	0.64	1.82	1.71	0.86		1.03		1265.1		2.38	2.52	25.7
C/C	C/C	female	Uyghur	55	8.94	5.88	3.09	2.52	3.31	2.71	0.86	0.69	1.9	1.19	1.12	1.04	0.75	0.52	131.38	72.59	2.45	2.02	14.84
C/C	C/C	male	Uyghur	42	16.8	5.82	1.23	1.02	4.67	3.25	2.21	1.08	2.88	1.71	1.97		0.85		302.64		2.46	2.17	20.46
C/C	C/C	female	Uyghur	56	7.81	4.92	0.89	1.07	3.38	3.65	0.9	0.69	2.61	2.68	0.96	0.84	0.71	0.88	154.17	136.7	2.48	2.96	37.46
C/C	C/C	female	Uyghur	54	7.06	7.06	1.14	1.09	3.47	2.65	0.97	0.84	2.04	1.38	1.22	1.06	0.73	0.54	290.92	859.05	2.5	1.81	21.2
C/T	C/C	male	Uyghur	56	5.32	4.85	1.4	1.86	4.26	4.3	1.76	0.71	2.79	3.17	0.98	0.88	0.98	1.02	349.97	170.3	2.5	3.59	36.8
C/T	C/C	male	Uyghur	45	9.25	8.71	1.38	2.24	3.16	3.66	0.65	0.89	1.92	2.48	0.89	0.96	0.81	0.99	177.79	102.37	2.51	2.77	37.6
C/C	C/C	male	Uyghur	51	4.99	4.39	1.41	2.99	3.05	4.8	0.48	0.71	1.88	3.1	0.79	0.89	0.88	1.27	94.3	51.33	2.57	4.09	68.3
C/C	C/C	male	Uyghur	51	4.99	4.39	1.41	2.99	3.05	4.8	0.48	0.71	1.88	3.1	0.79	0.89	0.88	1.27	94.3	51.33	2.57	4.09	68.3
C/T	C/C	male	Uyghur	51	7.81	4.36	1.74	1.8	3.39	6.57	0.66	1.58	1.8	4.84	1.4	1.27	0.62	1.52	455.23	301	2.73	4.99	64.45
C/C	C/C	male	Uyghur	58	4.66	4.65	1.17	0.85	3.67	4.6	0.92	0.96	2.36	3.23	0.98	1.02	0.87	1.01	77.08	74.3	2.75	3.64	28.1
C/T	C/C	male	Uyghur	52	11.68	7.7	5.35	2.03	3.94	2.75	1.17	0.88	2.86	1.67	0.91	1.05	0.83	0.57	48.53	53.26	2.77	1.87	17.27
C/C	C/C	male	Uyghur	48	5.76	5.68	1.47	1.63	4.24	2.6	1.43	1.09	2.96	1.61	1.27	1.07	0.9	0.51	119.32	127.18	2.81	1.51	21.36
C/C	C/C	male	Uyghur	48	8.5	15.14	0.7	1.58	3.97	4.07	1.16	0.99	2.5	2.34	1.19	1.32	0.85	0.69	344.1	450.22	2.81	3.08	18.2
C/T	C/C	female	Uyghur	64	5.14		1.09	0.92	3.7	3.08	0.87	0.67	2.52	2.06	0.72	0.77	0.92	0.71	57.4	29.3	2.83	2.41	11.9
T/T	A/A	male	Uyghur	65	6.46	6.54	1.39	1.5	3.86	3.51	1.01	1.22	2.71	2.08	1.07	1.27	0.96	0.68	574.2	726.8	2.85	2.29	19.3
C/T	C/C	male	Uyghur	64	6.46	9.43	1.08	1.18	4.25	3.97	1.38	1.23	3.39	2.44	1.32	1.23	0.75	0.63	70	51	2.87	2.74	13
C/T	C/C	female	Uyghur	47	5.09	4.71	1.44	0.99	3.82	3.95	0.95	1.03	2.55	2.57	1.05	1.04	0.81	0.72	123.9	76.6	2.87	2.92	14.3
C/T	C/C	female	Uyghur	55	4.77	4.55	2.18	1.91	4.21	3.76	1.34	1.36	2.9	2.45	1.34	1.21	0.91	0.78	133.45	170.41	2.87	2.4	15.77
C/C	C/C	female	Uyghur	68	5.23	4.89	1.02	1.48	4.18	3.55	1.3	1.4	2.64	1.76	1.09	1.52	0.34	0.49	380.85	689	2.88	2.15	12.7
C/T	C/C	male	Uyghur	75	7.18	4.49	1.52	0.6	4.29	5.35	1.36	1.67	2.98	3.69	1.63	1.53	0.98	1.12	622.56	263	2.93	3.68	42.12
C/C	C/C	male	Uyghur	41	9.61	11.68	1.92	1.66	4.3	2.6	1.37	1.08	3.1	1.1	1.19	1.06	0.92	0.53	291.58	206.7	2.93	1.52	15.36
C/T	C/C	female	Uyghur	70	6.29	9.13	2.45	1.34	4.28	5.25	1.34	1.03	2.88	3.61	1.46		0.88		322.9		2.94	4.22	93.69
C/T	C/C	male	Uyghur	48	4.6	4.78	1.63	1.16	3.84	4.96	0.89	1.36	2.5	3.59	1.06	1.21	0.86	1.41	206.3	213.87	2.95	3.6	9.3
C/C	C/C	male	Uyghur	71	4.73	5.31	1.56	0.95	4.53	3	1.57	1.21	3.24	1.71	1.43	1.2	1.02	0.46	248.62	224.93	2.96	1.79	20.35
C/C	C/C	male	Uyghur	50	5.13		2.08	1.47	3.9	3.73	0.92	0.76	2.42	2.11	1.07	0.98	0.97	0.84	195.9	233.6	2.98	2.97	41
T/T	C/A	female	Uyghur	59	4.58	4.06	1.51	1.21	4.19	2.95	1.21	1.41	3.03	1.94	1.01	0.97	0.97	0.81	443.35	1188.52	2.98	1.54	68.98
C/T	C/C	female	Uyghur	48	5.04	3.9	1.56	0.96	4.26	2.66	1.25	0.85	3.03	1.58	1.28	0.95	0.96	0.69	262.7	47.1	3.01	1.81	19.3
T/T	C/A	female	Uyghur	67	4.47	8.31	2.27	2.49	4.14	3.5	1.13	0.77	2.97	2.21	1.22	1.08	0.91	0.71	153	321.46	3.01	2.73	20.5
T/T	C/C	male	Uyghur	65	4.63	4.24	1.53	0.95	3.7	2.79	0.68	0.82	2.66	1.67	0.89	0.79	1.03	0.84	102.2	105.3	3.02	1.97	12
T/T	C/A	male	Uyghur	44	4.08	7.19	2.04	1.94	3.81	2.8	0.75	0.86	2.66	1.91	1.15	0.8	0.78	0.63	478.75	632.18	3.06	1.94	26.28
T/T	C/A	male	Uyghur	59	5.14	5.48	0.7	1.39	4.11	3.05	1.03	1.49	2.47	2.26	1.13	1.14	0.72	0.84	68.72	107.71	3.08	1.56	35.76
C/C	C/C	male	Uyghur	65	4.11	5.71	0.91	1.29	3.77	3.24	0.68	0.72	2.83	1.93	0.84		0.84		193.05		3.09	2.52	34.23
C/C	C/C	male	Uyghur	46	4.81	6.94	1.23	0.96	4.08	2.77	0.99	1.25	3.02	1.7	1.09	1.17	1.11	0.53	236.69	189.87	3.09	1.52	36.88
C/C	C/C	male	Uyghur	41	7.51	4.84	2.92	1.07	4.03	3.84	0.92	1.04	2.84	2.34	0.97	1.22	0.72	0.7	22	54.86	3.11	2.8	62.91
T/T	C/A	male	Uyghur	73	4.56	4.59	1.38	1.15	4.21	2.93	1.09	1.03	2.61	1.45	1.2	1.12	0.98	0.6	272.77	93.7	3.12	1.9	32.1
C/T	C/A	female	Uyghur	52	5.93	6.59	1.86	3.02	4.03	4.16	0.89	1.13	2.81	2.85	1.11	1.2	0.76	0.95	126.46	272.4	3.14	3.03	38
C/T	C/C	female	Uyghur	60	9.98	4.19	2.32	0.64	4.29	2.6	1.15	1	3.01	1.45	1.06	1.13	0.97	0.49	134.7	77.88	3.14	1.6	16.91
C/C	C/C	male	Uyghur	53	5.42	8.42	2.55	1.35	4.15	3.19	1.01	0.8	2.74	1.91	1	0.79	0.9	0.63	147.9	151.11	3.14	2.39	22.9
C/C	C/C	male	Uyghur	49	10.67	8.16	1.68	1.72	3.96	2.97	0.81	0.73	2.84	1.7	1.03	1.02	0.75	0.71	84	37.2	3.15	2.24	48.5
C/T	C/C	male	Uyghur	55	14.75	6.63	1.46	1.19	4.19	4.27	1.04	1.01	2.46	2.82	0.96	1.12	1.11	0.97	246.53	699.86	3.15	3.26	26.9
C/T	C/C	male	Uyghur	63	4.7	5.93	0.94	0.75	4.31	2.42	1.15	0.98	2.92	1.32	1.12	0.99	0.92	0.62	19.7	1.3	3.16	1.44	27.7
C/C	C/C	male	Uyghur	70	3.97	3.82	0.85	0.85	4.19	4.09	1.03	0.89	3.03	3.22	0.83	1.05	1	1.01	92.12	132.5	3.16	3.2	14.43
C/C	C/C	female	Uyghur	48	4.62	5.02	1.54	1.17	4.07	2.55	0.91	0.77	2.9	1.4	0.89	0.9	0.67	0.57	258	283.5	3.16	1.78	44.3
C/T	C/C	male	Uyghur	52	5.94	6.44	5.95	0.6	4.57	2.51	1.41	0.8	2.89	1.69	1.08	0.77	0.78	0.68	983.89	167.95	3.16	1.71	28.37
C/C	C/C	male	Uyghur	60	6.78	8.21	0.87	0.63	4.06	3.66	0.89	0.98	3.44	2.6	1.03	1.07	1.02	0.82	163.7	210.61	3.17	2.68	42.5
C/C	C/C	female	Uyghur	67	6.5	7.63	2.14	1.22	4.14	2.86	0.97	0.99	2.65	1.76	1.26	0.93	1	0.64	558.1	986.9	3.17	1.87	12.1
C/T	C/C	male	Uyghur	59	6.11	5.18	0.64	0.89	4.14	3.06	0.95	0.93	3.3	2.07	1.29	1.04	0.81	0.77	52	60.2	3.19	2.13	116.6
C/T	C/C	male	Uyghur	76	3.58	4.96	1.67	2.89	4.55	3.53	1.36	1.08	3.01	1.66	1.31	1.03	1	0.75	116.46	227.56	3.19	2.45	105.7
T/T	C/C	female	Uyghur	56	5.89	5.32	1.79	1.55	4.25	4.71	1.06	1.04	2.6	3.04	1.1	1.04	0.89	0.95	84.4	86.21	3.19	3.67	42.6
C/T	C/C	male	Uyghur	52	5.84	9.51	1.89	1.82	4.14	2.6	0.94	0.6	3.02	1.17	1		1.04		11.28		3.2	2	13.72
C/T	C/C	male	Uyghur	52	4.44	4.63	3.04	4.3	4.01	3.89	0.81	0.89	2.9	2.42	1	1.09	0.92	0.76	295.04	100.26	3.2	3	13.64
T/T	C/C	male	Uyghur	50	4.14	4.77	1.25	2.88	4.09	3.27	0.88	1.05	3.03	1.96	0.98	1.41	0.92	0.57	469.87	364.9	3.21	2.22	28.02
C/C	C/C	male	Uyghur	54	5.56	7.01	2.28	1.16	4.41	3.84	1.2	0.67	3.33	2.58	1.15	0.8	1.12	0.74	156.51	52.4	3.21	3.17	29.9
C/T	C/C	male	Uyghur	53	6.32	9.01	1.17	0.74	4.04	3.44	0.81	0.73	2.81	2.66	0.78	0.9	0.91	0.76	285.59	146.64	3.23	2.71	36.68
C/C	C/C	male	Uyghur	50	6.45	5.84	2.05	2.62	4	4.74	0.77	0.86	2.53	2.87	1.13	0.94	0.83	0.87	114.3	71.98	3.23	3.88	67.2
C/T	C/C	male	Uyghur	50	4.4	4.35	1.98	1.41	4.01	4.08	0.77	0.79	3.02	2.95	0.79	0.91	0.78	0.99	624	886.3	3.24	3.29	121.4
C/T	C/C	male	Uyghur	63	15.94	14.64	1.14	0.95	4.49	3.66	1.25	0.68	2.88	2.59	1.17	0.69	0.93	0.97	100.32	84.7	3.24	2.98	20.4
C/T	C/C	male	Uyghur	44	4.62	4.03	1.55	1.35	4.28	2.9	1.04	0.79	2.68	1.61	1.23	0.84	0.96	0.68	95.4	102.3	3.24	2.11	50.4
C/C	C/C	male	Uyghur	54	4.1	4.35	1.66	2.28	4.22	5.53	0.95	0.9	2.7	3.78	0.99	1.12	0.98	1.22	174.3	577.5	3.27	4.63	21.4
C/C	C/C	male	Uyghur	64	6.83	3.87	2.33	0.94	4.25	4.29	0.98	1.32	2.75	2.82	1.11	1.19	0.71	0.92	508.37	185.7	3.27	2.97	15.94
C/C	C/C	male	Uyghur	64	7.78	7.74	1.57	1.04	4.72	4.47	1.44	1.23	3.46	3.15	1.23	1.33	1.13	1.18	166.1	166.9	3.28	3.24	19.58
T/T	C/C	male	Uyghur	57	8.63	5.95	1.2	1.25	4.23	4.07	0.95	0.84	2.96	2.9	0.99	0.97	0.99	0.93	221.41	127.3	3.28	3.23	36.7
C/T	C/C	male	Uyghur	53	5.3	4.97	0.85	1.41	4.53	4.5	1.24	0.97	2.82	3.64	1.3	1.13	0.78	0.89	376	595	3.29	3.53	54.3
C/T	C/C	female	Uyghur	59	5.62	8.25	0.96	1.37	4.49	5.49	1.2	0.79	2.95	3.94	1.31	1.15	0.97	0.97	630.1	483.31	3.29	4.7	11.8
C/C	C/C	male	Uyghur	66	4.9	5.7	1.02	1.46	4.32	4.47	1.03	1.11	3.03	3.25	1.11	0.84	1.04	1.36	159.73	215.26	3.29	3.36	20.1
T/T	C/C	male	Uyghur	66	6.25	13.63	1.42	2.47	4.75	3.57	1.46	1.03	3.55	1.85	1.23	1.26	1.08	0.61	265.2	111	3.29	2.54	16.75
C/T	C/A	male	Uyghur	68	4.92	4.83	1.76	2.36	4.36	4.33	1.07	0.96	2.71	2.68	1.1	1.32	1.06	0.98	200.4	150.69	3.29	3.37	26.6
C/T	C/C	male	Uyghur	66	4	4.45	0.47	0.87	4.35	3.67	1.05	1.08	3.14	2.19	1.34	1.25	1.09	0.63	191.9	135	3.3	2.59	31.4
T/T	C/A	male	Uyghur	57	13.57	11.81	2.23	2.23	4.09	5	0.79	1.1	2.54	3	1.52	1.16	0.95	1.06	94.3	65	3.3	3.9	19.5
C/T	C/C	female	Uyghur	39	4.31	3.83	2.04	1.48	4.13	3.16	0.82	0.65	2.94	1.85	0.97	0.97	0.95	0.56	32.3	117.48	3.31	2.51	17
T/T	C/C	male	Uyghur	50	7.34	2.91	1.79	2.15	4.26	3.86	0.94	0.72	2.99	2.58	0.97	1.07	1.09	0.79	265.18	147.24	3.32	3.14	34.72
C/T	C/C	male	Uyghur	58	4.87	4.64	2.07	1.41	4.18	4.06	0.86	1.4	2.68	2.52	1.08	1.49	0.92	0.98	178.3	374.7	3.32	2.66	52.8
C/T	C/C	female	Uyghur	60	5.24	4.85	2.26	1.86	4.5	4.3	1.18	0.71	3.42	3.17	1.08	0.88	1.08	1.02	364.61	170.3	3.32	3.59	23.57
C/T	C/C	male	Uyghur	63	13.43	8.05	2.29	1.97	4.41	6.46	1.09	1.07	2.83	4.62	1.02	1.32	1.01	1.45	303.19	173.13	3.32	5.39	69.85
C/C	C/C	male	Uyghur	64	5.45	5.03	1.51	1.48	4.33	2.45	1	0.93	3.31	1.67	1.19	0.91	1.12	0.56	238	256.69	3.33	1.52	19.83
C/T	C/C	male	Uyghur	52	5.27	4.34	1.99	1.32	4.08	4.27	0.75	0.74	3.07	3.04	0.97	0.86	0.94	1.6	183.79	224.81	3.33	3.53	14.58
C/C	C/C	female	Uyghur	60	5.56	4.6	0.62	0.97	4.15	2.21	0.81	0.92	2.81	1.33	1.14	1.01	1.34	0.4	44.94	236.59	3.34	1.29	13.4
C/C	C/C	female	Uyghur	60	5.56	4.53	2.62	1.02	4.15	2.29	0.81	1.23	2.81	1.24	1.14	1.17	0.34	0.44	144.94	132.28	3.34	1.06	13.4
C/C	C/C	male	Uyghur	64	4.55	4.52	2.27	2.38	4.22	3.73	0.87	1.36	2.63	2.51	1.06	1.23	0.98	0.78	1469.3	503.83	3.35	2.37	16
C/C	C/C	male	Uyghur	48	5.93	8.21	2.55	2.38	4.14	5.28	0.79	0.93	2.78	3.53	0.93	1.14	0.95	0.92	243.86	288	3.35	4.35	35.8
C/C	C/C	male	Uyghur	55	5.05	4.81	1.58	2.69	4.29	3.66	0.94	0.79	3.01	2.21	1.15	0.85	1.02	0.71	140	62	3.35	2.87	31.9
C/T	C/C	male	Uyghur	39	18.38	15.64	1.68	1.7	4.17	3.89	0.82	0.92	3.07	2.92	0.91	0.87	0.81	1.15	115.85	81.74	3.35	2.97	33.49
C/C	C/C	female	Uyghur	66	9.74	7.3	3.14	0.84	4.04	3.24	0.69	1.26	2.49	1.99	1.11	1.25	1.03	0.77	94.29	92.5	3.35	1.98	7.9
C/T	C/A	male	Uyghur	61	4.38	4.91	0.84	1.51	4.53	4.85	1.18	1.09	3.05	3.41	1.17	1.19	1.1	0.86	1639.8	435	3.35	3.76	16.1
C/C	C/C	male	Uyghur	72	4.55	6.56	1.3	1.5	4.23	2.95	0.88	0.76	2.33	2.01	0.92	0.94	1.14	0.77	97.5	109.05	3.35	2.19	9
T/T	C/C	male	Uyghur	50	4.99	5.29	1.45	3.03	4.56	4.86	1.19	0.98	3.29	2.8	1.22		1.1		554.4		3.37	3.88	28
C/T	C/C	male	Uyghur	57	4.06	5.91	0.75	0.79	4.25	3.5	0.87	0.92	3.03	2.43	0.88	0.9	1.09	0.59	513.7	731.5	3.38	2.58	12.2
C/T	C/C	female	Uyghur	54	12.04	9.86	1.64	4.21	4.35	4.17	0.96	0.95	2.87	2.47	1.31	1.38	1.05	0.97	244.3	634.8	3.39	3.22	53.7
C/T	C/A	male	Uyghur	72	7.64	6.03	4.38	1.8	4.01	5.53	0.61	1.35	2.93	3.88	1.55	1.42	1.04	1.15	204.8	29.8	3.4	4.18	18.8
C/T	C/C	male	Uyghur	53	6.13	7.93	1.7	3.18	4.61	3.55	1.21	0.77	3.35	1.91	1.11		1.08		171.02		3.4	2.78	97.7
T/T	C/C	male	Uyghur	50	4.74	4.56	0.83	1.12	4.31	2.56	0.89	0.71	2.93	1.53	1.18	0.92	0.81	0.64	31	56.2	3.42	1.85	26.2
C/C	C/C	male	Uyghur	60	6.47	4.78	1.37	1.07	4.23	4	0.81	0.82	2.82	2.71	0.96	0.98	0.89	0.67	179.4	147.2	3.42	3.18	20.1
C/T	C/A	male	Uyghur	54	4.84	4.95	1.59	1.38	4.24	3.05	0.82	0.7	2.88	1.9	1.15	0.88	0.69	0.66	320.9	345.3	3.42	2.35	26.1
C/C	C/C	male	Uyghur	46	5.67	4.32	2.87	2.05	4.25	4.25	0.82	1.15	2.98	2.47	1.35	1.21	1.17	0.9	135.09	166.94	3.43	3.1	21.2
C/C	C/C	female	Uyghur	48	5.42	5.66	1.72	2.08	4.39	3.34	0.95	0.74	2.8	2.38	1.13	1.06	0.99	0.84	568.56	871.63	3.44	2.6	30.5
T/T	C/C	female	Uyghur	59	6.04	6.81	1.43	2.46	4.2	4.32	0.76	0.88	3.07	2.6	0.99	1.15	0.83	0.99	88.5	63.03	3.44	3.44	13.6
C/T	C/C	male	Uyghur	60	3.88	3.93	0.72	0.68	5.14	4.08	1.69	1.73	3.01	2.09	1.48	1.49	0.95	0.65	253.7	792.1	3.45	2.35	11.9
C/T	C/C	male	Uyghur	56	4.38	4.78	0.97	0.97	4.69	5.22	1.24	1.31	2.99	3.47	1.28		0.94		828.95		3.45	3.91	21.2
C/C	C/C	male	Uyghur	67	3.88	10.9	1.65	1.72	4.37	3.38	0.92	0.8	2.97	2.07	1.11	1.09	1.03	0.66	293.92	182.36	3.45	2.58	23.5
C/T	C/A	male	Uyghur	45	8.4	7.22	1.79	1	4.25	2.96	0.8	0.95	3.58	1.67	1.11	0.99	1.11	0.81	108.51	87.3	3.45	2.01	19.6
C/C	C/C	male	Uyghur	68	3.9	4.24	2.13	2.12	4.24	5.38	0.79	1.07	2.75	3.84	0.97	1.2	1.52	1.19	88	97	3.45	4.31	15.4
C/C	C/C	female	Uyghur	53	13.55	7.92	3.25	3.16	4.27	3.47	0.8	0.62	2.75	1.65	0.99	0.86	1.03	0.76	332.08	182.99	3.47	2.85	10.9
T/T	C/C	male	Uyghur	53	6.79	5.85	1.62	0.91	4.12	2.92	0.65	1.05	2.63	1.61	1.21	1.13	1.26	0.68	258.16	248.9	3.47	1.87	24.3
C/C	C/C	male	Uyghur	63	4.89	5.7	1.45	1.47	4.42	5	0.94	0.92	3.13	3.7	1.17	0.96	1.31	0.9	287.09	304	3.48	4.08	18.7
C/C	C/C	male	Uyghur	40	4.78	8.17	1.86	3.58	4.23	2.95	0.75	0.59	3.05	0.73	1.05		1.02		39.2		3.48	2.36	43.4
C/T	C/C	male	Uyghur	47	7.7	12.37	4.29	5.21	4.12	5.63	0.62	0.69	2.09	2.81	1.01	1.18	0.93	1.29	83	3	3.5	4.94	56.5
C/T	C/C	female	Uyghur	69	6.45	13.02	0.87	0.7	4.42	2.75	0.92	0.97	3.01	1.54	1.08	1.04	0.87	0.53	117.61	112.6	3.5	1.78	23
C/T	C/C	female	Uyghur	60	5.37	4.4	1.22	1.45	5	4.16	1.5	1.04	3.61	2.68	1.4	1.09	1.13	0.98	90.84	82.8	3.5	3.12	15.37
C/T	C/A	male	Uyghur	55	4.18	4.02	1.07	2.13	4.38	5.92	0.87	0.85	3.27	4.4	1.21	1.21	1.13	1.43	88.3	73.8	3.51	5.07	24.1
T/T	A/A	male	Uyghur	45	13.68	11.84	3.13	7.17	4.36	4.62	0.85	0.52	2.93	1.89	0.87	1.13	1.12	1.18	184.47	125.9	3.51	4.1	45.05
C/C	C/C	female	Uyghur	48	4.55	5.18	1.57	1.67	4.34	4.98	0.82	1.5	3.09	3.39	0.97	1.4	1.01	1.13	397.84	346.05	3.52	3.48	58.4
C/T	C/C	male	Uyghur	56	5.18	12.73	3.17	3.13	4.29	3.31	0.77	1.34	2.89	2.24	1.47	1.23	0.97	0.74	711.95	1546.24	3.52	1.97	12.8
C/C	C/C	male	Uyghur	70	5.45	11.03	2.07	5.02	4.57	4.56	1.05	0.82	2.94	2.99	1.23	1.33	1.02	0.9	117.38	264.46	3.52	3.74	25
C/C	C/C	male	Uyghur	62	6.91	4.55	1.16	0.92	4.34	3.15	0.81	0.93	2.89	1.97	1.23	0.9	0.84	1.15	796.4	341.2	3.53	2.22	30.2
C/T	C/C	male	Uyghur	56	6.2	14.33	2.16	2.86	4.27	4.04	0.73	0.68	3.02	2.4	1.05	1.3	0.82	1.02	140.54	74.8	3.54	3.36	16.4
C/C	C/C	male	Uyghur	65	9.33	4.71	1.23	1.06	4.34	5.02	0.8	1.26	2.94	4.14	0.66	1.43	0.5	1.43	653.87	1.16	3.54	3.76	58.09
C/T	C/C	male	Uyghur	54	5.74	4.6	1.45	1.36	4.09	3.26	0.55	0.68	2.94	2.14	1.46	0.85	1.19	0.54	89	103.79	3.54	2.58	17.9
C/T	C/C	male	Uyghur	58	4.37	4.26	2.27	2.17	4.11	3.06	0.57	0.84	2.72	4.45	1.04	1.43	0.83	0.63	47	114.2	3.54	2.22	22.8
C/T	C/C	male	Uyghur	61	7.1	8.11	2.07	2.07	4.67	6.57	1.12	0.93	2.93	4.63	1.08	0.97	0.87	1.58	32.5	36.1	3.55	5.64	33.9
C/T	C/C	male	Uyghur	41	3.87	5.01	2.4	1.83	4.59	3.53	1.04	0.78	3.38	2.25	0.92	1.01	1.13	0.71	201.57	40.7	3.55	2.75	41.17
C/C	C/C	female	Uyghur	64	4.79	5.05	1.77	1.99	4.3	3.35	0.74	1.03	3.16	2.24	0.92	1.01	1.03	0.93	320.22	463.57	3.56	2.32	11.62
C/C	C/C	female	Uyghur	59	6.07	7.55	1.48	0.63	4.36	2.58	0.8	1.01	2.61	1.4	1.3	1.11	0.8	0.52	540.68	623.3	3.56	1.57	17.33
C/T	C/C	male	Uyghur	63	6.75	5.72	2.69	2.1	4.42	3.92	0.85	0.81	2.71	2.49	1.15	1.15	0.96	1.03	455.18	482.85	3.57	3.11	73.2
T/T	C/C	male	Uyghur	61	6.36	4.57	2.21	0.74	4.27	3.19	0.69	0.5	2.73	2.45	0.74	0.62	0.92	0.8	257.63	235.6	3.58	2.69	22.91
C/C	C/C	female	Uyghur	46	3.86	4.74	1.09	1.93	4.76	4.44	1.18	1.15	3.29	3.04	1.08	1.44	1.08	1.07	65.11	46.3	3.58	3.29	18.9
T/T	C/C	male	Uyghur	43	4.46	5.41	2.58	3.43	4.34	2.94	0.76	0.74	2.79	0.64	1.06		0.93		22.1		3.58	2.2	24.6
C/T	C/C	male	Uyghur	50	4.79	4.59	2.63	0.61	4.84	3.63	1.26	1.21	2.86	2.13	1.42	1.14	0.93	0.77	149.99	182.39	3.58	2.42	26.4
C/C	C/C	male	Uyghur	51	12.49	7.04	2.08	1.42	4.58	4.16	0.99	0.59	3.33	3.09	1.98	0.8	1.16	1.03	355.53	315.3	3.59	3.57	15.9
C/C	C/C	female	Uyghur	59	6.14	5.19	1.51	2.43	4.61	3.3	1.02	1.69	3.37	1.95	1	1.39	1.22	0.75	235.7	410.15	3.59	1.61	16.4
C/C	C/C	male	Uyghur	66	4.12	4.21	1.5	1.14	4.6	4.31	1	1	3.23	2.94	1.16	1.05	1.03	0.97	333.7	301.4	3.6	3.31	70.7
C/T	C/A	male	Uyghur	69	4.03	7.5	1.45	2.43	4.66	3.6	1.06	1.1	3.15	2.79	1.19	1.04	1	0.71	396.79	210.05	3.6	2.5	21.9
C/T	C/C	male	Uyghur	50	6.15		3.13	2.52	4.37	5.66	0.77	0.75	3.1	3.68	0.97		0.91		91.6		3.6	4.91	106.9
C/T	C/C	male	Uyghur	39	3.88	4.29	1.24	1.96	4.77	4.02	1.15	0.91	3.77	2.63	1.15	1.07	0.89	1.03	349	301	3.62	3.11	19
T/T	C/A	male	Uyghur	46	4.04	4.05	1.79	2.33	4.43	5.84	0.81	0.77	2.81	4.66	1.11	1.1	1.18	1.45	479.24	231.9	3.62	5.07	38.2
C/C	C/C	male	Uyghur	58	9.26	12.01	1.57	0.9	4.5	3.65	0.87	1.12	3.09	2.12	1.11		1		47.63		3.63	2.53	23.8
C/C	C/C	female	Uyghur	69	7.73	9.24	2.05	2.3	4.46	5.24	0.83	0.81	2.89	3.81	1.03	0.95	0.96	1.45	236.4	184.3	3.63	4.43	9.2
C/T	C/C	male	Uyghur	71	4.99	5.53	2.5	1.17	4.77	4.49	1.13	1.42	2.8	2.7	1.3	1.66	0.53	1.4	953.76	1106	3.64	3.07	47.5
C/T	C/C	male	Uyghur	59	12.99	12.66	2.25	1.25	4.77	3.28	1.13	0.84	3.58	1.96	1.14	1.04	1.16	0.7	807.54	339.4	3.64	2.44	13.8
C/C	C/C	female	Uyghur	72	10.18	7.29	0.86	1.06	4.57	3.86	0.93	0.99	3.2	1.38	1.23	0.93	0.9	0.42	110.74	78.13	3.64	2.87	16.9
C/T	C/C	female	Uyghur	56	4.76	4.74	0.81	0.98	6.03	5.81	2.38	2.15	4.07	3.55	1.72	1.66	1.03	0.94	781.2	327.9	3.65	3.66	14
C/T	C/C	female	Uyghur	46	4.49	5.24	1.68	1.43	4.94	2.66	1.29	0.94	3.23	1.45	1.31	1.25	0.93	0.69	149.7	146.91	3.65	1.72	28.9
C/T	C/C	male	Uyghur	74	6.9	8.62	0.56	0.9	4.81	4.15	1.15	1.21	3.46	2.36	1.07	1.48	1.01	0.71	182.65	260.09	3.66	2.94	34.99
C/C	C/C	male	Uyghur	48	3.62	4.94	1.95	1.06	4.61	2.77	0.95	0.83	3.1	1.7	1.24	0.86	0.87	0.62	151.8	227.8	3.66	1.94	42
C/T	C/C	male	Uyghur	38	3.62	4.94	1.95	1.06	4.61	2.77	0.95	0.83	3.1	1.7	1.24	0.86	0.87	0.62	151.8	227.8	3.66	1.94	42
C/C	C/C	male	Uyghur	60	8.96	5.13	3.1	0.94	5.09	4.32	1.42	0.95	3.54	3.18	1.31	1.02	1.07	0.92	196.56	59.9	3.67	3.37	11.7
C/C	C/C	female	Uyghur	50	4.65	4.57	1.24	1.17	4.78	4.2	1.1	1.07	2.65	2.85	1.17	1.2	0.79	0.83	187	34.9	3.68	3.13	16.2
T/T	C/C	male	Uyghur	54	8.18	17.37	2.39	0.52	5.12	3.04	1.43	1.24	3.33	1.78	1.32	0.99	1.09	0.54	154.72	111.48	3.69	1.8	28.78
C/C	C/C	male	Uyghur	66	8.93	8.14	1.02	0.8	4.59	3.42	0.89	0.91	3.09	2.41	1.12	1.06	1.02	0.73	306	403.2	3.7	2.51	28.6
T/T	A/A	male	Uyghur	50	5.16		3.75	2.95	4.41	3.57	0.71	0.85	2.7	1.59	0.94	1.22	1	0.67	116.7	85.6	3.7	2.72	32.5
C/T	C/A	male	Uyghur	49	6.33	5	3.35	2	4.39	5.5	0.68	1.12	2.85	3.89	0.94	0.95	1.08	1.27	61.98	55.46	3.71	4.38	19.09
C/C	C/C	female	Uyghur	55	18.86	11.99	4.12	4.02	4.35	6.39	0.63	1.34	2.37	3.76	0.58	1.61	0.84	1.4	0.4	42.96	3.72	5.05
C/T	C/C	male	Uyghur	50	4.66	12.95	2	1.62	4.26	3.43	0.52	0.81	2.22	2.39	1.32	0.82	1.01	0.67	711.5	748	3.74	2.62	96.9
C/C	C/C	male	Uyghur	53	5.28	8.01	1.05	2.58	4.65	2.4	0.91	0.87	3.03	1.17	1	0.89	0.97	0.48	55.91	28.66	3.74	1.53	16.8
C/T	C/C	female	Uyghur	43	4.69	3.8	0.85	0.57	4.91	3.36	1.16	1.67	3.34	2.06	1.5	1.34	0.95	0.63	111.67	146.26	3.75	1.69	15.7
C/C	C/C	male	Uyghur	59	10.31	9.14	1.48	1.32	4.03	4.24	0.28	1.18	2.71	3.18	0.91	1.14	0.95	1.05	146.02	124.88	3.75	3.06	51.11
T/T	C/C	male	Uyghur	65	6.48	5.88	1.5	0.79	4.73	2.94	0.98	1.3	3.13	1.89	1.37	1.19	1	0.62	65.72	87.5	3.75	1.64	20
C/C	C/C	male	Uyghur	52	4.29	3.78	1.67	1.35	4.69	4.35	0.94	1.21	2.97	3.35	1.09	1.21	1.01	1.2	142.75	322.7	3.75	3.14	16.6
T/T	C/C	male	Uyghur	52	7.73	6.57	2.77	3.73	4.65	4.01	0.9	0.75	3.09	2.11	1.21	1.17	1.1	0.85	23.51	48.74	3.75	3.26	61.5
C/T	C/C	male	Uyghur	54	4.09	4.84	2.41	1.33	4.79	2.52	1.03	0.84	3.16	1.08	1.06	0.84	1.22	0.55	75.32	14.9	3.76	1.68	29
C/C	C/C	male	Uyghur	42	4.9	4.73	2.18	1.01	4.58	5.06	0.82	0.69	3.19	3.71	0.98	0.87	1.09	1.07	541.6	443.8	3.76	4.37	15.3
C/T	C/C	male	Uyghur	60	3.98	4.75	1.72	1.46	4.56	2.92	0.79	0.92	3.1	1.58	1.25	1.08	1.08	0.47	130.5	129.97	3.77	2	90.2
T/T	C/C	male	Uyghur	51	5.08	4.91	1.87	1.95	4.7	2.94	0.91	0.79	3	1.56	0.93	1.05	0.96	0.69	198.75	114.1	3.79	2.15	21.58
C/C	C/C	male	Uyghur	60	3.89	9.75	3.91	2.03	4.58	4.38	0.79	1	3.69	2.95	1.14	1.32	0.96	0.92	1196.49	340.56	3.79	3.38	24.79
C/T	C/C	male	Uyghur	58	5.19	5.48	2.3	1.62	4.76	2.74	0.95	1.28	3.3	1.84	1.11	0.93	0.94	0.79	245.31	163.29	3.81	1.46	31.46
C/T	C/C	male	Uyghur	75	5.42	5.15	2.24	1.98	4.6	3.64	0.79	0.75	4.27	2.44	1.01	0.98	1.05	0.92	312.2	291.4	3.81	2.89	20.6
C/T	C/C	male	Uyghur	55	15.08	6.56	2.17	2.23	4.53	4.64	0.72	0.67	3.43	3.29	1.04	1.03	1.31	1.02	95.42	90.36	3.81	3.97	46.4
T/T	C/C	male	Uyghur	68	4.72	4.77	1.32	1.29	5.05	3.56	1.22	1.02	3.54	2.26	0.95	1.11	1.07	0.75	359.61	120.8	3.83	2.54	36.87
C/T	C/A	female	Uyghur	67	4.56	5.26	1.68	1.53	4.58	3.77	0.75	0.73	2.93	2.39	1.06	0.99	0.75	0.98	151.7	162.07	3.83	3.04	13.6
C/C	C/C	male	Uyghur	53	11.26	17.47	2.9	8.21	4.09	4.14	0.26	0.9	2.86	2.05	0.9	1.07	0.93	0.75	294.7		3.83	3.24	33.7
C/C	C/C	male	Uyghur	63	11.06	6.41	6.78	2.98	4.62	3.61	0.79	0.79	2.39	2.5		0.99		0.86		40.95	3.83	2.82	21.69
C/C	C/C	male	Uyghur	53	7.43	7.25	9.98	4.24	4.58	3.62	0.75	0.74	2.86	1.72	1.13	1.05	0.51	0.64	1791.68	43	3.83	2.88	18.09
C/T	C/C	female	Uyghur	64	13.14	9.28	1.41	1.2	4.6	3.52	0.76	0.49	3.3	2.73	0.84	0.53	1.27	1.24	589.85	341.7	3.84	3.03	12.2
C/C	C/C	male	Uyghur	68	6.91	6.83	2.16	1.12	4.61	2.58	0.77	1.1	2.8	1.69	0.94	1.01	1.09	0.62	335.7	519.94	3.84	1.48	31.1
C/C	C/C	male	Uyghur	47	5.27	5	1.36	0.73	5.1	4.12	1.25	1.34	3.59	2.72	1.26	1.36	0.89	1.03	154	77.5	3.85	2.78	33
C/C	C/C	male	Uyghur	56	5.41	6.99	1.71	1.28	4.66	3.29	0.81	1.35	3.05	2.2	1	1.16	1.01	0.77	242.17	159.01	3.85	1.94	11.8
C/T	C/C	male	Uyghur	51	4.89	3.92	3.55	1.45	5.12	4.37	1.27	1.14	3.14	2.7	1.45	1.3	1.07	0.93	134.44	93.19	3.85	3.23	39.9
C/C	C/C	male	Uyghur	43	4.05	6.87	1.44	3.08	4.36	3.35	0.51	0.54	3.26	2.02	0.56	0.71	1.31	0.66	207.6	226.69	3.85	2.81	15.2
C/C	C/C	male	Uyghur	73	8.01	14.72	1.07	1.47	4.71	5.37	0.85	1.48	3.55	3.91	1.07	1.3	1.07	1.51	61.2	169.2	3.86	3.89	27.9
T/T	C/A	male	Uyghur	61	12.77	6.42	1.64	1.87	5.16	5.61	1.3	1.44	3.72	3.61	1.3	1.83	1.03	1.01	149.54	97.83	3.86	4.17	39.5
C/T	C/C	male	Uyghur	64	5.31	4.18	1.67	1.7	5.14	5.45	1.27	0.96	3.92	3.65	1.1	1.09	1.18	1.11	146.93	175.64	3.87	4.49	7.76
C/T	C/C	male	Uyghur	60	4.68	4.38	1.23	1.83	4.88	4.98	1	1.08	3.33	3.69	0.92	1.16	0.96	1.09	146	377.3	3.88	3.9	15.6
C/T	C/A	male	Uyghur	50	4.9	4.65	1.84	1.66	4.51	3.89	0.62	1.07	3.2	2.97	0.72	0.96	1.01	1.05	87.17	157.95	3.89	2.82	21.8
C/C	C/C	male	Uyghur	50	4.9	4.65	1.84	1.66	4.51	3.89	0.62	1.07	3.2	2.97	0.72	0.96	1.01	1.05	87.17	157.95	3.89	2.82	21.8
C/T	C/C	male	Uyghur	53	5.2	7.24	2.51	3.93	4.72	2.97	0.82	0.79	3.22	1.34	1.21	1.19	1.18	0.28	118.09	195.56	3.9	2.18	81.2
C/C	C/C	female	Uyghur	65	4.2	5.61	3.71	3.16	5.05	3.84	1.15	0.75	3.47	1.74	1.26	1.16	1.19	0.63	223.03	85.58	3.9	3.09	23.64
C/T	C/A	male	Uyghur	42	4.25	6.87	2.08	2.25	4.72	2.78	0.81	0.76	3.05	1.68	1.02	0.99	1.08	0.49	468.7	462.4	3.91	2.02	53.5
C/T	C/C	female	Uyghur	48	5.04	5.52	4.09	1.13	5.22	3.81	1.31	0.97	3.46	2.48	1.3	1.04	0.9	0.85	438	606.2	3.91	2.84	11
C/C	C/C	male	Uyghur	42	4.57	6.96	5.53	6.09	4.84	4.94	0.93	0.84	3.1	2.51	1.14	1.12	1.09	0.95	419.2	437.65	3.91	4.1	63.3
C/C	C/C	male	Uyghur	50	5.07	5.17	1.88	1.22	4.61	3.75	0.7	0.84	3.17	2.39	1	0.88	1.04	0.74	123.8	287.78	3.91	2.91	39.7
C/T	C/C	female	Uyghur	61	4.96	4.72	2.55	2.34	4.61	4.4	0.7	0.76	3.34	2.82	0.97	0.75	1.22	1.13	91.6	64.4	3.91	3.64	31.9
C/C	C/C	male	Uyghur	62	11.05	6.27	3.63	0.59	4.77	3.36	0.85	1.34	3.42	1.5	0.9	1.06	1.12	0.57	729.47	626.52	3.92	2.02	21.17
C/T	C/C	male	Uyghur	42	3.53	4.36	2.85	1.8	4.79	6.57	0.87	1.58	2.73	4.84	1.09	1.27	1.12	1.52	1244	301	3.92	4.99	48.7
C/T	C/C	female	Uyghur	42	3.53	4.36	2.85	1.8	4.79	12.7	0.87	1.58	2.73	4.84	1.69	1.27	1.12	1.52	1.12	301	3.92	11.12	48.7
C/T	C/C	female	Uyghur	48	4.09	5.18	0.88	1.34	4.67	2.96	0.73	0.71	3.78	2.11	0.84	1.02	1.19	0.94	209.21	189.75	3.94	2.25	12.8
C/C	C/C	male	Uyghur	44	5.93	5.82	1.58	1.43	4.98	3.08	1.04	0.73	3.4	1.86	0.96	0.87	0.93	0.56	197.43	15.19	3.94	2.35	90.27
C/T	C/C	male	Uyghur	56	5.29	4.41	1.65	1.4	5.07	4.03	1.12	0.89	3.68	2.98	1.24	1.13	1.17	0.98	42.64	48.8	3.95	3.14	20.2
T/T	C/C	male	Uyghur	55	5.03	5.58	2.71	1.03	4.85	2.49	0.89	1.21	3.1	1.61	1.24	1.04	1.13	0.53	100	145.06	3.96	1.28	17.8
C/T	C/C	male	Uyghur	63	7.32	5.51	1.84	0.9	4.77	3.15	0.81	0.94	3.43	1.89	0.99	0.94	0.74	0.66	966.83	723.2	3.96	2.21	41.97
C/T	C/C	male	Uyghur	65	5	7.6	4.93	4.97	4.68	3.99	0.72	0.61	1.94	2.55	1.59	1.14	0.78	0.61	91	693.4	3.96	3.38	17.7
C/T	C/C	male	Uyghur	67	4.73	5.03	0.7	1.09	5	4.03	1.03	1.16	3.68	2.6	1.04	1.34	1.07	0.71	1647	647.55	3.97	2.87	15.7
C/T	C/C	male	Uyghur	56	6.56	6.17	2.23	2.08	4.64	5.17	0.67	1.05	3.29	3.42	1.03	1.14	1.02	1.36	90.36	91.6	3.97	4.12	21.3
C/C	C/C	male	Uyghur	63	11.58	13.46	2.08	1.34	4.91	3.45	0.91	0.96	3.78	1.74	1.15	0.99	0.98	0.48	179.53	140.67	4	2.49	7.91
C/T	C/A	male	Uyghur	47	3.95	4.66	1.09	1.22	5.02	4.24	1.01	1.09	3.83	2.68	1.09	1.26	1.06	0.74	80.1	344.41	4.01	3.15	30.9
T/T	C/C	male	Uyghur	45	5.19	4.49	3.23	0.99	5.02	2.78	1.01	0.99	3.2	1.53	1.18	1	0.67	0.69	66	87.7	4.01	1.79	25
C/T	C/A	female	Uyghur	50	8.05	12.53	3.51	2.94	4.79	4.41	0.78	0.65	3.07	2.99	0.83	0.85	1.19	1.02	59.32	34.5	4.01	3.76	13.81
C/C	C/C	male	Uyghur	48	5.53	5.28	1.91	1.15	4.82	4.45	0.81	0.84	3.82	3.35	0.71	0.66	1.26	1.19	608.37	816.3	4.01	3.61	29.55
C/T	C/C	female	Uyghur	36	4.34	4.71	1.63	2.14	5.09	4.13	1.07	0.84	3.3	2.69	1	1.09	1.03	0.98	181.5	23.42	4.02	3.29	31.7
C/C	C/C	male	Uyghur	48	4.93	4.95	2.5	1.29	4.88	3.97	0.86	0.69	3.28	2.01	1.1	1.32	0.76	1.02	21	103.68	4.02	3.28	50
C/T	C/C	male	Uyghur	38	4.12	4.83	3.45	1.64	4.78	4.26	0.76	0.85	2.94	2.92	1.65	0.96	1.08	0.99	175.36	118.86	4.02	3.41	41.9
C/C	C/C	female	Uyghur	54	10.57	4.91	0.92	1.23	5.27	3.77	1.24	1.18	3.24	2.26	1.56	1.24	0.99	0.81	80.23	50.4	4.03	2.59	33.34
C/T	C/A	male	Uyghur	65	8.63	3.99	0.88	0.6	5.14	2.43	1.1	1.16	3.26	1.47	1.24	1.01	0.14	0.53	283.11	249.34	4.04	1.27	88.25
C/T	C/C	male	Uyghur	69	4.41	4.07	1.96	1.28	5.1	4.7	1.06	1.04	3.33	3.07	1.04	1.02	1.1	0.87	132.4	84.46	4.04	3.66	23.6
C/T	C/A	male	Uyghur	57	4.71	4.41	0.87	0.83	4.96	5.25	0.91	1.06	3.48	3.67	0.81	1.06	1.15	1.19	1331.21	151.9	4.05	4.19	37.06
C/C	C/C	male	Uyghur	34	4.23	4.06	3.28	9.64	4.84	4.92	0.79	0.63	2.82	1.42	0.99	1.31	1.19	0.83	400.4	657.81	4.05	4.29	32.1
C/T	C/C	male	Uyghur	49	4.68	6.9	3.86	0.88	5.09	6.08	1.04	1.71	2.83	3.78	1.42	1.3	0.93	1.24	178	614.25	4.05	4.37	27.97
T/T	C/A	female	Uyghur	66	16.27	8.84	3.98	1.83	5.06	6.23	1	1.4	3.2	4.17	1.3	1.47	0.9	1.3	989.11	662.5	4.06	4.83	38.41
C/T	C/C	male	Uyghur	35	4.59	5.06	3.31	3.76	4.61	5.01	0.55	0.7	2.97	3.79	0.9	0.9	1.14	1.04	59.51	47.6	4.06	4.31	49.9
C/T	C/C	male	Uyghur	49	5.36	5	4.28	2.51	5.2	4.75	1.14	0.95	3.5	3.19	1.3	1.25	1.13	1.04	106.2	130.6	4.06	3.8	97.6
C/T	C/C	male	Uyghur	55	6.17	4.62	1.9	1.33	5.08	3.82	1.01	1.04	3.55	2.72	1.08	1.03	0.89	0.87	416.83	444.66	4.07	2.78	29.1
C/T	C/C	male	Uyghur	57	4.03	3.21	2.41	1.73	4.96	3.5	0.88	0.87	3.5	2.24	1.14	1.02	1.05	0.84	223.87	240.46	4.08	2.63	11.5
C/T	C/C	female	Uyghur	68	6.31	4.77	1.37	1.68	5.25	4.56	1.16	1.18	3.67	3.06	1.22	1.44	0.97	0.75	242.15	28	4.09	3.38	11.74
C/T	C/C	male	Uyghur	41	9.05	8.4	3.44	2.65	5.24	5.26	1.15	1.55	3.18	2.87	1.51	1.45	1.13	0.84	32	59	4.09	3.71	121.8
C/T	C/C	male	Uyghur	48	24.59	13.43	2.16	3.01	4.65	4.77	0.55	1.3	3.41	3.06	0.69	1.1	1.33	1.11	538.32	478.84	4.1	3.47	29.61
C/T	C/C	male	Uyghur	52	6.8	5.86	3.23	2.42	5.23	3.3	1.12	0.5	3.76	1.98	1.03	0.87	1.24	0.8	230.18	104.33	4.11	2.8	28.37
C/T	C/C	male	Uyghur	45	8.42	9.02	3.12	2.28	5.22	4.93	1.1	1.04	3.08	2.97	1.22	1.31	0.97	1.1	53.9	92.5	4.12	3.89	44.1
C/C	C/C	male	Uyghur	54	8.35	12.12	2.35	1.05	4.75	2.34	0.63	0.66	3.22	1.44	1.02	0.86	1.05	0.5	100.61	86	4.12	1.68	17.1
C/T	C/C	male	Uyghur	37	3.55	4.17	1.66	2.36	4.9	3.01	0.76	0.77	3.56	2.13	1	0.84	1.04	0.66	514.7	620.66	4.14	2.24	64.9
C/T	C/C	female	Uyghur	62	4.78	4.8	4.3	1.47	5.15	3.69	1.01	1.46	3.68	2.37	1.27	1.56	1.03	0.74	88	134.1	4.14	2.23	45.7
C/C	C/C	male	Uyghur	51	9.7	7.82	3.28	2.11	5.08	3.39	0.93	1.06	2.83	1.77	1.26	1.25	0.99	0.63	76.2	36.2	4.15	2.33	148.2
C/C	C/C	male	Uyghur	67	4.95	5.15	1.73	1.06	5.16	3.07	1	1.08	3.73	1.92	1.05	1.1	1.19	0.76	256.3	447.2	4.16	1.99	14.4
T/T	C/A	male	Uyghur	64	4.6	8.39	1.34	1.77	5.27	3.83	1.1	1.07	3.94	2.45	1.03	1.35	1.18	0.73	44.1	132.7	4.17	2.76	12.4
C/C	C/C	male	Uyghur	64	4.54	4.17	2.13	1.2	5.76	4.66	1.59	1.45	3.51	2.31	1.51	1.3	0.97	0.77	66	70	4.17	3.21	34
C/T	C/C	male	Uyghur	54	5.97	4.61	1.05	1.06	5.07	3.11	0.89	0.73	3.94	2.05	1.07	0.87	0.92	0.69	599.51	381.8	4.18	2.38	17.6
C/C	C/C	male	Uyghur	67	6.83	6.11	1.13	1.04	5.32	3.1	1.14	1.03	3.64	1.84	1	0.99	1.23	0.52	284.2	171	4.18	2.07	28.6
C/C	C/C	female	Uyghur	68	4.39	3.87	1.57	1.5	5.17	3.5	0.98	0.81	3.75	2.03	0.95	0.96	1.19	0.73	114.06	189.33	4.19	2.69	18.4
C/C	C/C	male	Uyghur	48	5.84	6.36	2.09	2.64	5.36	4.65	1.16	1.12	3.47	2.94	1.34	1.17	1.16	1.21	48.9	80.36	4.2	3.53	38.1
C/C	C/C	male	Uyghur	45	4.69	4.18	1.21	1.67	5.55	4.78	1.34	1.18	3.75	3.29	1.41	1.29	1.2	1.01	301.9	238	4.21	3.6	19
C/C	C/C	male	Uyghur	47	4.95	5.94	2.57	1.7	5.53	3.46	1.32	1.09	3.18	1.99	1.14	0.94	1.25	0.58	58.98	66.8	4.21	2.37	33.34
C/C	C/C	female	Uyghur	67	5.29	5.5	1.23	1.15	5.4	4.26	1.19	1.26	3.95	2.69	1.15	1.43	1.2	0.81	487.1	340	4.21	3	35.4
C/T	C/C	male	Uyghur	47	4.54	4.06	1.26	1.66	5.12	4.79	0.9	1.2	3.82	3.4	1.07	1.46	1.23	1.15	124.02	96.1	4.22	3.59	32.8
C/T	C/C	male	Uyghur	57	6.82	3.13	2.71	1.42	5.38	4.06	1.15	0.76	3.11	2.71		0.93		0.99		156.1	4.23	3.3	20.97
C/C	C/C	female	Uyghur	67	9.84		3.66	1.06	5.11	3.64	0.88	1.24	3.6	2.17	1.16	1.19	0.89	0.76	70.9	70.6	4.23	2.4	42.45
C/T	C/C	male	Uyghur	63	6.71	17.18	4.09	1.54	4.92	3.64	0.68	0.67	3.25	2.48	1.45	0.94	1.23	0.81	132.58	44.2	4.24	2.97	15.1
C/T	C/C	male	Uyghur	41	7.14	4.83	5.62	6.22	5.18	5.79	0.94	0.77	3.44	2.43	0.96	1.35	1.02	0.95	123	133.23	4.24	5.02	29.71
C/T	C/C	male	Uyghur	58	5.72	6.58	0.87	0.83	5.66	3.52	1.42	1.4	3.95	2.01	1.39	1.6	1.12	0.57	65.7	123.9	4.24	2.12	24.3
C/C	C/C	female	Uyghur	57	5.12	10.58	1.74	2.6	5.14	4.58	0.86	0.92	3.69	3.23	1.01	1.08	1.26	0.93	197.4	305.2	4.28	3.66	12.9
C/T	C/C	male	Uyghur	48	5.19	5.9	1.59	0.92	5.42	2.89	1.14	1.36	3.88	1.7	1.23	1.28	1.14	0.58	138.03	104.3	4.28	1.53	30.7
C/T	C/C	male	Uyghur	48	4.11	6.06	1.06	1.22	5.18	4.59	0.89	0.78	3.52	3.43	1.09	1	1.28	1.01	15.3	140.05	4.29	3.81	18
C/T	C/C	male	Uyghur	49	4.11	6.06	1.06	1.22	5.18	4.59	0.89	0.78	3.52	3.43	1.09	1	1.28	1.01	154.3	140.05	4.29	3.81	18
C/T	C/C	male	Uyghur	59	4.74	4.19	1.21	2.23	5.3	5.84	0.99	1.22	3.75	4.55	1.06	1.1	1.47	1.38	259.91	327.63	4.31	4.62	28.8
C/C	C/C	male	Uyghur	73	5.36	6.25	1.36	2.44	5.16	5.45	0.85	0.92	3.69	3.71	1.18	1.23	1.27	1.13	600.3	416	4.31	4.53	22.32
C/T	C/C	male	Uyghur	53	5.45	7.25	2.28	1.92	5.16	3.92	0.85	0.96	3.55	2.49	1.22	1.13	0.93	0.83	355	511.6	4.31	2.96	28.3
C/C	C/C	male	Uyghur	55	5.45	7.25	2.28	1.92	5.16	3.92	0.85	0.96	3.55	2.49	1.22	1.13	0.93	0.83	355	511.6	4.31	2.96	28.3
C/C	C/C	female	Uyghur	63	5.17	5.29	2.75	2.64	5.29	4.5	0.98	0.89	3.63	2.96	1.27	1.12	0.98	0.9	85.63	77.7	4.31	3.61	17.2
T/T	C/C	female	Uyghur	67	4.46	17.8	3.3	0.08	5.48	3.22	1.17	2.01	3.39	1.33	1.78	4.4	1.09	0.58	149.43	218.19	4.31	1.21	20
C/T	C/C	female	Uyghur	52	4.81	5.05	1.54	1.88	5.26	5.64	0.94	0.94	3.74	3.47	1.16	1.16	1.03	1.12	431.65	721.09	4.32	4.7	12.7
C/C	C/C	male	Uyghur	61	5.76	4.37	2.1	3.31	5.84	3.92	1.5	0.86	3.67	2.37	1.62	1	1.26	0.63	65.93	87	4.34	3.06	71.1
C/C	C/C	male	Uyghur	45	5.08	6.72	1.94	2.27	5.15	3.18	0.81	0.98	3.59	1.73	1.05	0.84	1.19	0.75	129.91	252.84	4.34	2.2	79.2
C/C	C/C	male	Uyghur	61	4.89	4.65	1.63	2.15	5.27	1.88	0.92	0.92	3.92	3.21	1.04	1.11	1.27	1.08	255.9	228.7	4.35	0.96	24.2
C/T	C/C	female	Uyghur	72	13.23	12.33	2.55	1.89	5.63	5.19	1.26	1.64	4.07	3.83	1.17	1.29	1.46	1.19	86.64	156.61	4.37	3.55	23.3
C/C	C/C	male	Uyghur	57	4.9	4.91	1.67	1	5.59	3.21	1.2	1.06	3.81	1.85	1.49	1.16	1.37	0.78	131.06	63.5	4.39	2.15	17.5
C/T	C/C	male	Uyghur	53	4.07	3.49	1.08	0.58	5.58	2.51	1.19	0.7	3.91	1.84	1	1.01	1.3	0.63	325.21	328.4	4.39	1.81	31.62
C/T	C/C	female	Uyghur	61	5.57	8.51	2.5	4.18	5.16	5.04	0.77	0.89	4.12	3.08	1.15	1.15	1.15	1.06	150.6	144	4.39	4.15	22
C/C	C/C	male	Uyghur	53	5.22	5.92	1.14	2.32	5.24	3.24	0.84	0.78	3.53	2.13	0.74	0.76	0.9	0.68	513.84	150.52	4.4	2.46	14.37
C/C	C/C	male	Uyghur	53	9.53	7.6	1.47	1.35	5.33	4.87	0.91	0.89	4.01	3.3	1.14	1.08	1.39	1.17	866.7	925	4.42	3.98	22.3
C/T	C/C	male	Uyghur	67	6.48	7.24	4.09	1.66	5.27	3.27	0.84	0.69	3.88	1.86	1.13	0.83	1	0.81	14	56	4.43	2.58	12.8
C/T	C/C	male	Uyghur	52	5.91	6.85	1.46	1.12	5.31	2.7	0.88	0.87	3.66	1.47	1.08	0.95	1.14	0.59	112.68	59.59	4.43	1.83	34.8
C/T	C/C	male	Uyghur	49	13.53	9.16	3.48	1.53	5.32	3.03	0.87	0.82	2.77	1.75	0.94	0.94	1.11	0.75		111.65	4.45	2.21	19.57
C/C	C/C	female	Uyghur	71	6.32	5.39	4.43	2.68	5.23	2.88	0.78	0.72	3.25	0.94	1.07		0.92		142.7		4.45	2.16	63.94
C/C	C/C	male	Uyghur	66	5.29	4.07	1.56	1.54	5.32	5.04	0.86	0.92	3.37	2.98	1.04	1.35	0.46	1.01	243.1	292.65	4.46	4.12	20
T/T	C/C	male	Uyghur	55	5.75	5.15	2.49	1.92	5.55	4.43	1.09	1.06	3.83	2.97	1.35	1.27	1.35	0.82	143.51	154.32	4.46	3.37	24.6
C/T	C/C	female	Uyghur	53	4.54	4.7	2.17	1.73	5.46	4.6	0.98	0.9	3.49	3.11	1.12	1.13	0.85	1.26	83.9	91.42	4.48	3.7	10.7
C/C	C/C	male	Uyghur	53	8.38	6.93	11.61	5.18	5.11	3.84	0.62	0.57	2.76	2.04	0.54	0.79	0.54	0.8	748.71	4.1	4.49	3.27	38.22
C/T	C/C	male	Uyghur	49	4.64	5.23	2.87	1.5	5.09	6.14	0.59	0.85	3.75	4.74	0.82	1.01	1.2	1.54	587	626.5	4.5	5.29	79.3
C/T	C/C	male	Uyghur	66	7.24	5	2.92	1.8	5.54	5.1	1.02	0.89	3.77	3.89	1.11	1.07	1.24	1.09	138.88	84	4.52	4.21	23.24
C/T	C/C	male	Uyghur	47	5.4	5.09	2.66	1.49	5.95	2.64	1.43	0.97	3.7	1.31	1.75	1.21	1.3	0.55	93.6	66.7	4.52	1.67	24.4
C/T	C/C	male	Uyghur	50	5.17	5.81	3.78	1.76	5.54	4	1.01	1.07	3.54	2.69	1.18	1.09	1.28	0.9	51.1	60.5	4.53	2.93	61.7
T/T	C/A	male	Uyghur	67	4.76	4.38	1.62	1.05	5.64	4.99	1.1	1.15	3.97	3.93	1.33	1.16	0.91	1.15	460.59	1003.2	4.54	3.84	16.2
C/T	C/C	female	Uyghur	61	6	7.07	2.47	3.4	5.61	3.91	1.07	0.92	3.47	2.05	1.39		1.34		136.1		4.54	2.99	17.2
C/T	C/C	male	Uyghur	63	5.23	4.95	1.63	1.13	5.72	4.38	1.15	0.93	3.92	3.04	1.4	1.01	1.21	1.1	1394.4	1220	4.57	3.45	41.4
C/C	C/C	male	Uyghur	46	5.4	7.45	3.76	2.99	5.51	4.08	0.94	1.04	3.63	2.77	1.15	0.99	1.17	0.88	111.28	285.08	4.57	3.04	53.4
C/T	C/C	female	Uyghur	47	6.02	4.9	2.7	2.52	5.61	4.41	1.03	1.23	3.86	3.18	1.56	1.23	1.16	0.96	415.75	723.9	4.58	3.18	13.8
T/T	C/C	male	Uyghur	39	4.9	4.31	2.79	2.38	5.43	4.73	0.84	1.28	3.79	3.36	1.1	1.08	1.11	1.17	234	239.96	4.59	3.45	53.2
T/T	C/C	male	Uyghur	58	8.08	15.65	3.33	3.81	5.3	2.94	0.71	0.47	3.45	1.27	1.03	0.69	1.21	0.77	119.5	118.4	4.59	2.47	15
C/C	C/C	male	Uyghur	62	6.3	6.38	2.17	2.18	5.48	4.06	0.86	0.71	3.87	2.65	1.12	1.07	1.35	1	139.8	124	4.62	3.35	31
C/T	C/C	male	Uyghur	46	4.4	5.61	4.16	2.17	5.45	3.17	0.83	0.82	3.79	2.27	0.96	0.82	1.24	0.83	249.63	196.36	4.62	2.35	59.2
T/T	C/C	male	Uyghur	60	7.99	10.99	1.71	1.52	5.59	6.39	0.96	1.07	3.87	4.08	1.05	0.88	1.47	1.18	330.48	807.71	4.63	5.32	13.2
C/T	C/C	male	Uyghur	48	4.66	5.93	2.43	2.06	5.69	5.12	1.04	0.97	4.16	4.08	1.21	1.16	0.91	1.45	114	143.1	4.65	4.15	29
C/C	C/C	male	Uyghur	52	12.22	7.41	4.37	1.97	5.6	2.62	0.93	0.66	3.26	1.52	1.11	1.04	1.13	0.49	125.96	64.33	4.67	1.96	28.3
C/T	C/C	male	Uyghur	44	4.5	5.76	4.38	3.53	5.57	5.48	0.9	0.69	3.19	3.78	1.13	1.42	0.97	1.2	135	250.7	4.67	4.79	63.8
C/C	C/C	female	Uyghur	51	4.88	5.03	0.8	2.07	6.24	6.41	1.57	1.4	3.94	3.54	1.68	1.34	1.15	1.05	153	83	4.67	5.01	18
C/T	C/C	male	Uyghur	45	5.35	5.94	2.01	1.1	5.53	3.27	0.86	0.79	3.89	2.35	1.13	0.9	1.37	0.64	611.3	822.9	4.67	2.48	14.9
C/T	C/C	female	Uyghur	47	19.54	7.99	2.1	2.28	5.42	3.26	0.73	0.71	3.88	2.27	0.9	0.83	1.33	0.89	147.01	127.21	4.69	2.55	60.16
C/C	C/C	female	Uyghur	64	4.29	4.32	2.37	1.29	5.74	4.26	1.04	0.84	4.11	2.83	1.09	0.86	1.26	0.83	404	655.2	4.7	3.42	21.5
C/C	C/C	female	Uyghur	50	11.41	4.61	3.15	1.42	5.48	3.64	0.77	0.89	3.74	2.5	0.88	0.93	1.17	0.89	138.25	7.8	4.71	2.75	62.71
C/T	C/A	female	Uyghur	68	5.08	5.27	3.24	2.53	5.79	5.56	1.07	0.95	3.78	3.97	1.3	1.11	1.4	1.35	474.39	426.49	4.72	4.61	19.9
C/T	C/C	male	Uyghur	37	4.73	5.63	5.68	3.85	5.35	4.47	0.62	1.05	2.92	2.45	1.06	1.38	1.08	1	272.2	175.36	4.73	3.42	47.3
C/C	C/C	female	Uyghur	55	6.7	5.36	1.69	1.28	6.18	4.38	1.4	1.43	3.78	2.83	1.57	1.13	1.23	0.96	119.2	130.32	4.78	2.95	13.11
C/C	C/C	male	Uyghur	61	5.19	4.81	0.69	1.28	5.81	5.54	1.01	0.98	4.24	4	1.1	1.07	1.37	1.23	122	144.4	4.8	4.56	25
C/C	C/C	male	Uyghur	55	5.62	4.41	1.3	0.99	5.72	3.77	0.92	0.75	4.14	2.73	0.94	0.76	1.23	0.94	231.21	204.37	4.8	3.02	31.6
C/C	C/C	male	Uyghur	31	4.85	5.53	1.83	2.72	5.43	5.01	0.57	0.84	3.95	3.23	0.8	1.26	1.44	1.34	227.1	253.5	4.86	4.17	183.4
C/C	C/C	male	Uyghur	43	6.58	6.43	1.29	2.11	5.74	4.6	0.85	0.6	4.4	3.15	1.21	0.97	1.26	0.83	12	56.03	4.89	4	17.92
C/C	C/C	male	Uyghur	46	4.26	4.87	5.87	1.92	5.74	3.44	0.84	0.89	2.84	2.08	1.44	1.07	1.17	0.6	465.62	132.71	4.9	2.55	32.5
C/C	C/C	male	Uyghur	52	3.89	5.09	1.65	2.77	5.64	5.05	0.69	0.77	3.77	3.39	1.12	1.15	1.24	1.24	157.18	121.92	4.95	4.28	202.66
C/C	C/C	male	Uyghur	48	4.95	4.7	1.73	2.03	5.68	4.97	0.72	0.94	4.01	3.55	0.87	1.16	1.31	1.03	484.46	21.65	4.96	4.03	9.5
C/C	C/C	female	Uyghur	61	7.25	8.64	1.67	1.34	5.84	6.56	0.85	1.38	4.35	4.74	0.99	1.28	1.51	1.34	63.7	80.2	4.99	5.18	22.6
C/C	C/C	female	Uyghur	66	8.36	21.1	2.71	1.75	6.05	2.97	1.06	1.27	4.03	1.92	1.28	1.13	1.23	0.53	136	324.58	4.99	1.7	15.3
T/T	C/C	female	Uyghur	66	8.36	21.1	2.71	1.75	6.05	2.97	1.06	1.27	4.03	1.92	1.28	1.13	1.23	0.53	136	324.58	4.99	1.7	15.3
C/T	C/C	male	Uyghur	45	5.75	4.62	3.89	2.78	6.14	4.7	1.09	0.83	4.22	2.93	1.03	0.99	1.24	1.03	128.9	103.82	5.05	3.87	56.9
C/T	C/A	male	Uyghur	45	4.3	10.33	1.01		5.89		0.82		4.66		0.87		1.66		256.7		5.07	0	33.8
T/T	C/C	male	Uyghur	60	5.01	5.03	1.46	1.48	6.01	3.82	0.93	1.09	4.43	2.84	1.16	1.06	1.44	0.93	372	280.42	5.08	2.73	23.7
C/C	C/C	male	Uyghur	46	5.09	4.98	3.02	3.39	5.9	5.48	0.78	0.64	3.93	3.44	1.02	0.77	1.59	1.5	277.99	129.14	5.12	4.84	65.9
C/T	C/C	male	Uyghur	58	4.8	8.77	2.87	1.13	6	5.4	0.87	1.19	3.66	4.6	1.28	1.08	1.16	1	168	198	5.13	4.21	29.6
T/T	C/C	female	Uyghur	60	7.2	7.57	6.78	3.76	5.86	4.93	0.7	0.6	2.9	2.78	1.16	0.98	1.06	1.24	153	174	5.16	4.33	29.9
C/T	C/C	female	Uyghur	68	6.97	5.55	1.85	1.37	5.85	3.12	0.64	0.84	4.29	2.37	0.87	0.75	1.48	0.88	59.7	110.3	5.21	2.28	31.5
C/C	C/C	male	Uyghur	40	6.05	4.85	7.64	0.95	6.13	2.75	0.91	1	4.04	1.58	1.32	1.15	1.11	0.64	1372.67	731.7	5.22	1.75	40.93
C/T	C/C	female	Uyghur	59	10.99		1.82	1.46	6.57	3.87	1.32	1.31	5.46	2.46	1.53	1.56	1.59	0.81	861.8	1115.4	5.25	2.56	23.8
C/T	C/C	male	Uyghur	62	6.28	12.95	2.05	1.62	6.09	3.43	0.8	0.81	4.14	2.39	1.09	0.82	1.16	0.67	938.7	748	5.29	2.62	21.9
C/T	C/A	male	Uyghur	68	14.22	3.56	1.58	0.85	6.6	3.54	1.27	1.22	5.08	2.27	1.23	1.14	1.38	0.84	494.93	496.42	5.33	2.32	49.91
C/C	C/C	male	Uyghur	55	8.63	7.87	1.01	1.18	6.26	3.04	0.92	0.83	4.72	1.57	1.44	1.05	1.57	0.53	14	126.7	5.34	2.21	24.6
C/C	C/C	male	Uyghur	65	3.8	4.89	1.61	0.97	6.22	4.11	0.87	0.91	4.68	2.85	1.16	0.99	1.33	0.96	205.82	112.8	5.35	3.2	21.34
C/C	C/C	male	Uyghur	58	4.1	14.07	3.86	2.06	6.22	3.86	0.83	0.8	3.71	2.33	1.19	1.09	1.12	0.95	106.9	18.2	5.39	3.06	16.7
C/C	C/C	male	Uyghur	38	4.58	4.72	2.06	1.65	6.06	4.22	0.66	0.74	4.63	3.14	1.32	0.83	1.34	1.1	13.4	153.98	5.4	3.48	128.7
C/C	C/C	female	Uyghur	64	16.82	5.94	9.17	3.11	6.23	4.38	0.82	0.98	2.51	2.37	0.63	1.23	0.77	0.99	437.41	851.64	5.41	3.4	14.82
C/T	C/C	male	Uyghur	43	11.48	6.09	3.25	2.36	6.35	5.31	0.93	1.03	4.58	3.82	1.23	1.18	1.54	1.36	48.3	36.2	5.42	4.28	34.29
T/T	C/C	male	Uyghur	44	4.77	4.71	1.01	1.59	6.7	6.56	1.23	1.43	4.9	4.57	1.25	1.41	1.11	1.51	248.52	272.41	5.47	5.13	29.4
C/T	C/C	male	Uyghur	66	4.12	4.54	2.53	2	6.43	4.76	0.9	0.95	4.67	3.27	0.96	1.06	1.59	1.18	184	189.8	5.53	3.81	22.2
C/T	C/A	female	Uyghur	34	5.22	13.66	1.81	3.11	6.77	6.47	1.22	1.24	4.95	4.43	1.35	1.45	1.58	1.28	101.35	208.58	5.55	5.23	31
C/T	C/C	male	Uyghur	45	5.16	5.03	2.53	1.52	6.7	3.52	1.13	0.95	4.91	2.16	1.15	0.99	1.31	0.81	16.5	80.17	5.57	2.57	84
C/T	C/C	female	Uyghur	69	2.1	4.35	2.27	1.38	6.35	3.35	0.75	0.73	4.33	2.63	1.12	0.72	1.16	0.88	399.8	429.05	5.6	2.62	17.4
C/C	C/C	female	Uyghur	63	5.6	8.04	5.77	1.57	6.86	2.75	1.18	1.13	3.91	1.77	1.62	1.28	1.22	0.55	87.6	51	5.68	1.62	19.7
T/T	C/A	male	Uyghur	56	4.48	9.52	4.13	2	7	3.85	1.3	0.69	3.77	3.08	1.2	0.58	0.76	0.98	326.5	313.44	5.7	3.16	32.9
T/T	C/C	male	Uyghur	57	5.13		3.44	1.78	6.58	3.98	0.83	0.84	4.26	2.33							5.75	3.14	33
C/T	C/C	male	Uyghur	54	5.48	5.48	1.74	1.96	6.67	3.93	0.92	0.86	4.99	2.55	1.14	1.08	1.55	1.01	70.4	99.7	5.75	3.07	97.6
T/T	C/C	male	Uyghur	55	5.38	4.91	1.21	1.09	6.84	4.54	1.08	1.29	5.07	3.5	1.21	1.18	1.57	1.02	909.96	514.05	5.76	3.25	20.3
C/T	C/C	male	Uyghur	66	7	4.32	3.32	1.82	6.58	4.36	0.82	0.83	4.33	2.91	1.07	1	1.28	1.03	21	64.3	5.76	3.53	34.8
C/T	C/C	female	Uyghur	63	7.9	7.2	2.36	2.73	6.98	4.15	1.2	0.94	5.04	2.59	1.25	1.56	1.3	1.09	119	186.36	5.78	3.21	56.2
T/T	C/A	female	Uyghur	59	6.54	5.17	1.93	1.67	7.58	3.38	1.78	0.87	5.7	1.69	1.55	1.32	1.93	0.55	325.9	42	5.8	2.51	22
C/C	C/C	male	Uyghur	51	7.62	5.86	6.33	6.23	6.55	6.37	0.64	0.86	3.16	3.99	1.15	1.22	1.25	1.33	42.52	103.49	5.91	5.51	11.73
T/T	C/A	male	Uyghur	59	7.62	5.86	6.33	6.23	6.55	6.37	0.64	0.86	3.16	3.99	1.15	1.22	1.25	1.33	42.52	103.49	5.91	5.51	11.73
T/T	C/A	male	Uyghur	55	4.93	4.81	3.71	1.77	7.07	4.4	1.14	1.1	5.05	3.25	1.07	1.13	1.48	1.12	269.2	379.4	5.93	3.3	41
C/C	C/C	female	Uyghur	71	5.06	5.76	4.44	1.86	6.7	4.15	0.76	1.09	4.12	2.18	0.49	1.39	1	0.74	55.8	129.9	5.94	3.06	13.2
C/T	C/A	female	Uyghur	62	6.17	5.28	1.95	2.37	6.72	6.15	0.74	1.09	5.58	4.49	1.29	1.15	1.48	1.55	85	226.99	5.98	5.06	42.2
T/T	C/A	male	Uyghur	46	4.32	4.91	2.91	2.21	6.5	6.51	0.52	0.54	4.5	4.94	0.89	0.77	1.68	1.55	32	65	5.98	5.97	31.6
T/T	C/A	male	Uyghur	53	5.15	6.98	2.43	3.57	6.86	5.68	0.85	0.88	5.19	4.14	0.96	1.02	1.35	1.24	374.6	245.92	6.01	4.8	51.1
C/T	C/C	male	Uyghur	52	7.03	4.98	1.49	1.8	7.28	6.05	1	1.01	5.37	4.2	1.33	1.04	1.82	1.18	139	99.7	6.28	5.04	19.9
C/T	C/A	male	Uyghur	40	5.45	10.22	6.67	7.73	7.42	6.1	1.13	1.28	4.94	3.87	1.53	1.21	1.79	1.35	177.17	95.32	6.29	4.82	33.1
C/T	C/C	female	Uyghur	59	7.19	7.58	7.07	1.75	7.24	3.62	0.94	0.93	3.49	2.17	1.4	1.19	1.26	0.72	523.99	72.36	6.3	2.69	23.5
C/C	C/C	female	Uyghur	63	5.82	5.09	5.61	2.98	6.92	6.43	0.58	0.94	4.95	4.71	1.34	1.14	1.54	1.17	46.3	135.6	6.34	5.49	34
C/T	C/C	male	Uyghur	54	10.34	12.42	3.13	3.7	7.37	5.57	0.99	0.61	6.09	3.68	1.23	0.73	1.52	1.03	55	118.4	6.38	4.96	24.2
T/T	C/A	male	Uyghur	67	4.29	4.35	3.32	5.3	7.86	5.34	1.46	0.73	5.51	2.2	1.75	1.43	1.4	1.06	274.9	276.55	6.4	4.61	27.6
C/C	C/C	male	Uyghur	43	5.18	3.54	2.64	1.72	7.76	4.5	0.83	0.86	5.79	3.21	1.06	0.97	1.48	1.17	111.3	114.9	6.93	3.64	30.83
C/T	C/C	male	Uyghur	58	16.72	17.34	14.86	2.31	7.53	2.93	0.37	1.23	5.1	1.26	0.9	1.13	1.04	0.58	129.49	199.34	7.16	1.7	14.18
T/T	C/C	male	Uyghur	64	5.59	4.81	2.94	2.02	8.62	3.17	0.99	1	6.44	2.47	1.05	1	1.73	0.73	73.51	128.27	7.63	2.17	17.61
C/T	C/A	male	Uyghur	59	5.08	5.2	1.84	1.48	10.76	7.19	0.99	1.18	8.54	5.6	1.03	1.06	2.47	1.54	1176.9	1987.8	9.77	6.01	39
C/T	C/A	male	Uyghur	59	5.08	5.2	1.84	1.48	10.76	7.19	0.99	1.18	8.54	5.6	1.03	1.06	2.47	1.54	1176.9	1987.8	9.77	6.01	39
